# Supplementary material
Source: HighWire-hosted journal article supplement (http://www.qdcxjkg.com/highwire/filestream/180412/field_highwire_adjunct_files/0/Severe_Asthma_Guideline_RU.pdf)
Supplement: Severe_Asthma_Guideline_RU.pdf [file Severe_Asthma_Guideline_RU.pdf]

## Лечение тяжелой бронхиальной астмы: рекомендации Европейского респираторного общества и Американского торакального общества

*Fernando Holguin*<sup>1, a</sup> , *Juan Carlos Cardet*<sup>2, b</sup>, *Kian Fan Chung*<sup>3</sup>, *Sarah Diver*<sup>4</sup>, *Diogenes S. Ferreira*<sup>5, 6</sup>, *Anne Fitzpatrick*<sup>7</sup>, *Mina Gaga*<sup>8, c</sup>, *Liz Kellermeyer*<sup>9, d</sup>, *Sandhya Khurana*<sup>10</sup>, *Shandra Knight*<sup>9</sup>, *Vanessa M. McDonald*<sup>11</sup>, *Rebecca L. Morgan*<sup>12</sup>, *Victor E. Ortega*<sup>13</sup>, *David Rigau*<sup>14</sup>, *Padmaja Subbarao*<sup>15</sup>, *Thomy Tonia*<sup>16</sup>, *Ian M. Adcock*<sup>17</sup>, *Eugene R. Bleeker*<sup>18</sup>, *Chris Brightling*<sup>19</sup>, *Louis-Philippe Boulet*<sup>20</sup>, *Michael Cabana*<sup>21</sup>, *Mario Castro*<sup>22</sup>, *Pascal Chanez*<sup>23</sup>, *Adnan Custovic*<sup>24</sup>, *Ratko Djukanovic*<sup>25</sup>, *Urs Frey*<sup>26</sup>, *Betty Frankemölle*<sup>27</sup>, *Peter Gibson*<sup>28, e</sup>, *Dominique Hamerlijnck*<sup>27, f</sup>, *Nizar Jarjour*<sup>9</sup>, *Satoshi Konno*<sup>30</sup>, *Huahao Shen*<sup>31</sup>, *Cathy Vitary*<sup>32</sup>, *Andy Bush*<sup>33, j</sup>

- <sup>1</sup> Кафедра пульмонологии и медицины критических состояний, Университет Колорадо, Денвер (Колорадо, США)
- <sup>2</sup> Кафедра аллергологии и иммунологии, Университет Южной Флориды, Тампа (Флорида, США)
- <sup>3</sup> Отделение экспериментальной медицины и исследований, Национальный институт сердца и легкого, Имперский колледж Лондона (Лондон, Великобритания)
- <sup>4</sup> Отделение респираторной биомедицины, Университет Лейчестера (Лейчестер, Великобритания)
- <sup>5</sup> Отделение аллергологии и иммунологии, Больнично-клинический комплекс, Федеральный университет Параны (Куритиба, Бразилия)
- <sup>6</sup> Школа общественного здоровья и профилактической медицины, Университет Монаша (Мельбурн, Австралия)
- <sup>7</sup> Отделение пульмонологии, аллергологии и иммунологии, муковисцидоза и сна, Университет Эмори, Атланта (Джорджия, США)
- <sup>8</sup> Отделение респираторной медицины и центр бронхиальной астмы, Торакальный госпиталь (Афины, Греция)
- <sup>9</sup> Биомедицинская библиотека, Больница «Национальное еврейское здоровье», Денвер (Колорадо, США)
- <sup>10</sup> Кафедра пульмонологии и критических состояний, Университет Рочестера, Рочестер (Нью-Йорк, США)
- <sup>11</sup> Школа медицинских сестер, Университет Ньюкасла (Ньюкасл, Австралия)
- <sup>12</sup> Кафедра методов исследования здоровья, доказательных данных и оценки воздействия, Университет Макмастера, Гамильтон (Онтарио, Канада)
- <sup>13</sup> Кафедра пульмонологии, медицины критических состояний, аллергических и иммунологических заболеваний, Медицинская школа Уэйк-Форест, Уинстон-Сейлем (Северная Каролина, США)
- <sup>14</sup> Ибероамериканский центр Кохрейна (Барселона, Испания)
- <sup>15</sup> Педиатрическое отделение, Больница СикКидс, Торонто (Онтарио, Канада)
- <sup>16</sup> Институт социальной и профилактической медицины, Университет Берна (Берн, Швейцария)
- <sup>17</sup> Группа молекулярно-клеточной биологии, Национальный институт сердца и легкого, Имперский Колледж Лондона (Лондон, Великобритания)
- <sup>18</sup> Отделение генетики, кафедра геномики и точной медицины, Университет Аризоны, Тусон (Аризона, США)
- <sup>19</sup> Отделение респираторных исследований, Университет Лейчестера (Лейчестер, Великобритания)
- <sup>20</sup> Отделение респираторной медицины, Университет Лавала (Квебек, Канада)
- <sup>21</sup> Отделение общей педиатрии, Калифорнийский университет Сан-Франциско, Сан-Франциско (Калифорния, США)

<sup>a</sup> сопредседатель со стороны ATS; ORCID: <https://orcid.org/0000-0003-0979-8234>

<sup>b</sup> ORCID: <https://orcid.org/0000-0002-9731-4828>

<sup>c</sup> ORCID: <https://orcid.org/0000-0002-9949-6012>

<sup>d</sup> ORCID: <https://orcid.org/0000-0001-6115-4343>

<sup>e</sup> ORCID: <https://orcid.org/0000-0001-5865-489X>

<sup>f</sup> ORCID: <https://orcid.org/0000-0001-8464-0547>

<sup>j</sup> сопредседатель со стороны ERS

- <sup>22</sup> Кафедра пульмонологии и медицины критических состояний, Вашингтонский университет, Сент-Луис (Миссури, США)
- <sup>23</sup> Кафедра респираторных заболеваний, Университет Экс-Марсель (Марсель, Франция)
- <sup>24</sup> Кафедра педиатрических аллергических заболеваний, Национальный институт сердца и легкого, Имперский колледж Лондона (Лондон, Великобритания)
- <sup>25</sup> Отделение респираторных биомедицинских исследований, Университет Саутгемптона (Саутгемптон, Великобритания)
- <sup>26</sup> Кафедра педиатрии, Университетская детская больница (Базель, Швейцария)
- <sup>27</sup> Европейский легочный фонд (Лозанна, Швейцария)
- <sup>28</sup> Школа медицины и общественного здоровья, Университет Ньюкасла (Ньюкасл, Австралия)
- <sup>29</sup> Отделение пульмонологии и медицины критических состояний, Университет Висконсина, Мадисон (Висконсин, США)
- <sup>30</sup> Отделение респираторной медицины, факультет медицины и Высшая медицинская школа, Университет Хоккайдо (Хоккайдо, Япония)
- <sup>31</sup> Кафедра респираторной медицины и медицины критических состояний, Вторая больница при медицинском факультете Чжэцзянского университета (Ханчжоу, Китай)
- <sup>32</sup> Институт бронхиальной астмы, Университет Питтсбурга, Питтсбург (Пенсильвания, США)
- <sup>33</sup> Кафедра педиатрии, Имперский колледж Лондона, Национальный институт сердца и легкого (Лондон, Великобритания)

✉ Fernando Holguin, CU Anschutz Research Complex II, 12700 East 19<sup>th</sup> Avenue, 9C03, Aurora, CO 80045, США; e-mail: fernando.holguin@ucdenver.edu

## Резюме

В документе изложены клинические рекомендации по лечению тяжелой бронхиальной астмы (БА). Проведено подробное обобщение доказательных данных, в т. ч. метаанализов, для анализа всех имеющихся доказательств по вопросам, сформулированным объединенной рабочей группой Европейского респираторного (*European Respiratory Society – ERS*) и Американского торакального (*American Thoracic Society – ATS*) обществ. Доказательства оценивались по методике GRADE (*Grading of Recommendations, Assessment, Development and Evaluation*). Мультидисциплинарной рабочей группой экспертов по БА обсуждались обобщенные доказательные данные и сформулированы рекомендации в форме ответов на 6 конкретных вопросов. После сопоставления желательных и нежелательных последствий, качества доказательных данных, доступности и приемлемости различных вмешательств рабочей группой сформулированы следующие предложения:

- использовать антитела к интерлейкину (IL)-5 и рецептору IL-5 у взрослых больных тяжелой неконтролируемой эозинофильной БА;
- начинать анти-IL-5-терапию у взрослых больных с тяжелой БА при уровне эозинофилов в периферической крови  $\geq 150$  кл. / мкл;
- использовать пограничные значения для выявления подростков и взрослых с наиболее вероятной эффективностью анти-IgE-терапии при уровне эозинофилов в крови  $\geq 260$  кл. / мкл и фракции оксида азота в выдыхаемом воздухе  $\geq 19,5$  ppb;
- использовать ингаляционный тиотропия бромид у подростков и взрослых с тяжелой БА, не контролируемой терапией 4–5-й ступени согласно Глобальной инициативе по БА (*Global Initiative for Asthma – GINA*), или терапию 5-й ступени согласно Национальной программе по обучению больных и профилактике БА (*National Asthma Education and Prevention Program – NAEP*);
- для снижения частоты обострений БА у пациентов с персистирующими симптомами или БА, не контролируемой терапией 5-й ступени по GINA или NAEP, независимо от фенотипа БА, применять пробную долговременную терапию макролидами;
- использовать антитела к IL-4, -13 у взрослых пациентов с тяжелой эозинофильной или глюкокортикостероид-зависимой БА, независимо от уровня эозинофилов в крови.

При появлении новых доказательств эти рекомендации могут быть пересмотрены.

**Конфликт интересов.** *F. Holguin* заявляет об отсутствии конфликтов интересов. *J. C. Cardet* заявляет об отсутствии конфликтов интересов. *K. F. Chung* получил денежное вознаграждение за участие в заседаниях консультационных советов компаний *GlaxoSmithKline*, *AstraZeneca*, *Novartis*, *Merck*, *Boehringer Ingelheim*, *4D Pharma*, *Pieris* и *Teva* относительно лечения бронхиальной астмы, кашля и хронической обструктивной болезни легких, а также получал вознаграждение за выступления на различных мероприятиях. *S. Diver* заявляет об отсутствии конфликтов интересов. *D. S. Ferreira* сообщает о получении стипендии MTF 2015-02 от Европейского респираторного общества во время проведения исследования. *A. Fitzpatrick* заявляет об отсутствии конфликтов интересов. *M. Gaga* сообщает о получении грантов и персонального комиссионного вознаграждения от компаний *AstraZeneca* и *Chiesi*, грантов от компаний *Novartis*, *Menarini* и *Elpen*, персонального комиссионного вознаграждения от компаний *MSD* и *BMS*, за работу, не относящуюся к представленным рекомендациям. *L. Kellermeyer* заявляет об отсутствии конфликтов интересов. *S. Khurana* сообщает о получении грантов от компаний *GlaxoSmithKline* и *Sanofi* за работу, не относящуюся к представленным рекомендациям. *S. Knight* заявляет об отсутствии конфликтов интересов. *V. M. McDonald* сообщает о получении грантов от компании *GlaxoSmithKline*, грантов и персонального комиссионного вознаграждения от компании *AstraZeneca*, персонального комиссионного вознаграждения за работу в комиссии по выработке регламента обучения от компании *Menarini*, не относящихся к представленным рекомендациям. *R. L. Morgan* заявляет об отсутствии конфликтов интересов. *V. E. Ortega* заявляет об отсутствии конфликтов интересов. *D. Rigau* занимает должность методолога Европейского респираторного общества. *P. Subbarao* заявляет об отсутствии конфликтов интересов. *T. Tonia* занимает должность методолога Европейского респираторного общества. *I. M. Adcock* заявляет об отсутствии конфликтов интересов. *E. R. Bleeker* проводил клинические исследования для своих работодателей, медицинского факультета Уэйк-Форест и Аризонского университета, для компаний *AstraZeneca*, *MedImmune*, *Boehringer Ingelheim*, *Genentech*, *Johnson and Johnson* (*Janssen*), *Novartis*, *Regeneron* и *Sanofi Genzyme*, а также предоставлял платные консультации компаниям *AstraZeneca*, *MedImmune*, *Boehringer Ingelheim*, *GlaxoSmithKline*, *Novartis*, *Regeneron* и *Sanofi Genzyme*, не относящиеся к представленным рекомендациям. *C. Brightling* сообщает о получении грантов и персонального комиссионного вознаграждения от компаний *GlaxoSmithKline*, *Novartis*, *Genentech/Roche*, *Chiesi*, *4D Pharma*, *Glenmark*, *Boehringer Ingelheim*, *Mologic*, *Gossamer* и *AstraZeneca/MedImmune*, персонального комиссионного вознаграждения от компаний *Sanofi/Regeneron* и *Teva*, не относящихся к представленным рекомендациям. *L. P. Boulet* сообщает о получении исследовательских грантов за участие в многоцентровых исследованиях компаний *AstraZeneca*, *Boston Scientific*, *GlaxoSmithKline*,

*Hoffman La Roche, Novartis, Ono Pharma, Sanofi и Takeda*; поддержку исследовательских проектов, заявленных исследователем, от компаний *AstraZeneca, Boehringer Ingelheim, GlaxoSmithKline, Merck и Takeda*; работу в составе консультационных и экспертных советов для компаний *AstraZeneca, GlaxoSmithKline, Novartis и Methapharm*; некоммерческих грантов на составление образовательных материалов от компаний *AstraZeneca, Boehringer Ingelheim, GlaxoSmithKline, Merck Frosst и Novartis*; вознаграждения за выступления на конференциях от компаний *AstraZeneca, GlaxoSmithKline, Merck и Novartis*; поддержку участия в конференциях и встречах от компаний *Novartis и Takeda*. *M. Cabana* сообщает о получении персонального комиссионного вознаграждения за консультации от компаний *Genentech и Novartis*, не относящихся к представленным рекомендациям. *M. Castro* получил университетский грант от NIH, Американской пульмонологической ассоциации и PCORI; получил гранты на фармацевтические исследования от компаний *AstraZeneca, Boehringer Ingelheim, Chiesi, GlaxoSmithKline, Novartis и Sanofi-Aventis*; является действующим консультантом компаний *Aviragen, Boston Scientific, Genentech, Nuvaira, Neutronic, Therabron, Theravance, Vectura, 4D Pharma, VIDA, Mallinckrodt, Teva и Sanofi-Aventis*; выступает на конференциях от имени компаний *AstraZeneca, Boehringer Ingelheim, Boston Scientific, Genentech, Regeneron, Sanofi и Teva*; и получает лицензионные платежи от компании *Elsevier*. *P. Chanéz* выступал в роли консультанта компаний *Boehringer Ingelheim, GlaxoSmithKline, AstraZeneca, Novartis, Teva, Chiesi, Sanofi и SNCF*, входил в состав консультационных советов компаний *Boehringer Ingelheim, GlaxoSmithKline, AstraZeneca, Novartis, Teva, Chiesi и Sanofi*, получал вознаграждение за проведение лекций от *GlaxoSmithKline, AstraZeneca, Novartis, Teva, Chiesi, Boston Scientific и ALK* и получал коммерческие гранты от компаний *AstraZeneca, ALK и Novartis*. *A. Custovic* сообщает о получении персонального комиссионного вознаграждения за проведение консультации от компаний *Novartis, Regeneron/Sanofi, Boehringer Ingelheim и Philips*, комиссионного вознаграждения за проведение лекций от компаний *Thermo Fisher Scientific и Novartis*, не относящихся к представленным рекомендациям. *R. Djukanovic* сообщает о получении комиссионного вознаграждения за проведение лекций на симпозиумах, организованных компаниями *Novartis, AstraZeneca и Teva*, консультации для компаний *Teva и Novartis* в качестве члена экспертного совета, научные дискуссии по вопросам бронхиальной астмы, организованные компанией *GlaxoSmithKline*; и является сооснователем и действующим консультантом, а также имеет долю акций *Synairgen*, дочерней компании Саутгемптонского университета. *U. Frey* сообщает о получении персонального комиссионного вознаграждения за участие в собраниях научного консультационного совета компании *GlaxoSmithKline*, не относящихся к представленным рекомендациям. *B. Frankemölle* заявляет об отсутствии конфликтов интересов. *P. Gibson* сообщает о получении грантов и персонального комиссионного вознаграждения за проведение обучения от компании *GlaxoSmithKline*, грантов и персонального комиссионного вознаграждения за проведение обучения и лекций от компании *AstraZeneca*, персонального комиссионного вознаграждения за работу в комиссии по выработке регламента обучения от компаний *Novartis и Sanofi*, не относящихся к представленным рекомендациям. *D. Hamerlijnck* – независимый пациент-консультант компании *Novartis* по вовлечению пациентов со стороны Европейской федерации аллергических заболеваний и заболеваний дыхательных путей (EFA); пациент-сопредседатель Регистра больных тяжелой гетерогенной бронхиальной астмой ERS, пациент-ориентированного комитета по экспертизе клинических случаев; член научного консультационного совета *Veelbelovende Zorg for ZIN and ZonMw*; член научного консультационного совета BENEFIT (нидерландско-бельгийский совместный проект *ZonMw-KBC*); член консультационной группы пациентов IMI PARADIGM для EPF; член научного консультационного совета для ERA-NET NEURON *Biomarkers*; пациент-эксперт Нидерландской федерации пациентов и нескольких научных комитетов *ZonMw*. *N. Jarjour* сообщает о получении гранта от Национальных институтов здоровья *National Institutes of Health*; персональных компенсационных вознаграждений за консультации от компаний *AstraZeneca и Boehringer Ingelheim*, не относящихся к представленным рекомендациям. *S. Konno* сообщает о получении грантов от компаний *AstraZeneca, Kyorin Pharmaceutical, Japan Allergy Foundation, Novartis* и Министерства образования, культуры, спорта, науки и технологии Японии во время проведения исследования. *H. Shen* заявляет об отсутствии конфликтов интересов. *C. Vitari* заявляет об отсутствии конфликтов интересов. *A. Bush* заявляет об отсутствии конфликтов интересов.

**Благодарности.** Авторы выражают благодарность консультативной группе больных тяжелой бронхиальной астмой Европейского пульмонологического фонда, которые излагали взгляды и предпочтения пациентов на телеконференциях, конгрессах ATS и ERS, а также в письменном виде. Они помогли сформулировать и расставить приоритеты по основным вопросам и исходам.

**Заявление о спонсорстве.** Данная работа финансировалась ERS и ATS. Сведения о финансировании в рамках подготовки настоящей статьи были переданы в реестр финансирования *Crossref Funder Registry*.

Настоящий документ одобрен исполнительными комитетами ERS (26.08.19) и ATS (14.09.14).

Рекомендации, опубликованные ERS, охватывают данные, полученные в ходе подробного систематического обзора публикаций по самым последним на тот момент исследованиям. Медицинским работникам рекомендуется учитывать эти рекомендации в клинической практике. Однако эти клинические рекомендации подходят не ко всем ситуациям. Медицинские работники обязаны лично свериться с другими источниками соответствующей информации, принять целесообразные и правильные решения с учетом состояния здоровья конкретного пациента, при необходимости и (или) в соответствующих случаях консультироваться с пациентом и лицом, осуществляющим уход за ним, а также сверяться с правилами и нормами, действующим по отношению к рассматриваемым лекарственным препаратам и медицинским изделиям на момент назначения.

#### @ERS publications

Объединенная рабочая группа ERS и ATS составляет рекомендации по применению новых лекарственных препаратов для лечения тяжелой бронхиальной астмы, в особенности биологических препаратов для лечения T2-эндотипа бронхиальной астмы, M-холиноблокаторов и макролидов, а также биомаркеров для прогнозирования ответа на лечение (<http://bit.ly/2kZLRaD>).

**Заявление об отказе от ответственности.** Этот переведенный материал не проверялся перед выпуском, поэтому Европейское респираторное общество не несет ответственности ни за какие ошибки, пропуски или неточности в тексте, а также ни за какие их последствия. Воспроизведено с разрешения ©ERS, 2021.

*European Respiratory Journal*. 2020; 55: 1900588. DOI: 10.1183/13993003.00588-2019.

Опубликовано 02.01.20.

Перевод – Чашникова Е.П.

Редактор перевода – к. м. н. Чикина С.Ю.

Для цитирования: Holguin F., Cardet J.C., Chung K.F. et al. Management of severe asthma: a European Respiratory Society/American Thoracic Society guideline. *Eur. Respir. J.* 2020; 55: 1900588. DOI: 10.1183/13993003.00588-20

# Management of severe asthma: a European Respiratory Society/American Thoracic Society guideline

*Fernando Holguin*<sup>1, a</sup> , *Juan Carlos Cardet*<sup>2, b</sup>, *Kian Fan Chung*<sup>3</sup>, *Sarah Diver*<sup>4</sup>, *Diogenes S. Ferreira*<sup>5, 6</sup>, *Anne Fitzpatrick*<sup>7</sup>, *Mina Gaga*<sup>8, c</sup>, *Liz Kellermeyer*<sup>9, d</sup>, *Sandhya Khurana*<sup>10</sup>, *Shandra Knight*<sup>9</sup>, *Vanessa M. McDonald*<sup>11</sup>, *Rebecca L. Morgan*<sup>12</sup>, *Victor E. Ortega*<sup>13</sup>, *David Rigau*<sup>14</sup>, *Padmaja Subbarao*<sup>15</sup>, *Thomy Tonia*<sup>16</sup>, *Ian M. Adcock*<sup>17</sup>, *Eugene R. Bleeker*<sup>18</sup>, *Chris Brightling*<sup>19</sup>, *Louis-Philippe Boulet*<sup>20</sup>, *Michael Cabana*<sup>21</sup>, *Mario Castro*<sup>22</sup>, *Pascal Chanez*<sup>23</sup>, *Adnan Custovic*<sup>24</sup>, *Ratko Djukanovic*<sup>25</sup>, *Urs Frey*<sup>26</sup>, *Betty Frankemölle*<sup>27</sup>, *Peter Gibson*<sup>28, e</sup>, *Dominique Hamerlijnck*<sup>27, f</sup>, *Nizar Jarjour*<sup>9</sup>, *Satoshi Konno*<sup>30</sup>, *Huahao Shen*<sup>31</sup>, *Cathy Vitary*<sup>32</sup>, *Andy Bush*<sup>33, j</sup>

<sup>1</sup> Pulmonary Sciences and Critical Care Medicine, University of Colorado, Denver, CO, USA

<sup>2</sup> Allergy and Immunology, University of South Florida, Tampa, FL, USA

<sup>3</sup> Experimental Studies Medicine, National Heart and Lung Institute, Imperial College London, London, UK

<sup>4</sup> Respiratory Biomedical Unit, University of Leicester, Leicester, UK

<sup>5</sup> Alergia e Imunologia, Complexo Hospital de Clinicas, Universidade Federal do Parana, Curitiba, Brazil

<sup>6</sup> School of Public Health and Preventive Medicine, Monash University, Melbourne, Australia

<sup>7</sup> Division of Pulmonology Allergy/Immunology, Cystic Fibrosis and Sleep, Emory University, Atlanta, GA, USA

<sup>8</sup> Respiratory Medicine Dept and Asthma Centre, Athens Chest Hospital, Athens, Greece

<sup>9</sup> Biomedical Library, National Jewish Health, Denver, CO, USA

<sup>10</sup> Pulmonary Diseases and CriticalCare, University of Rochester, Rochester, NY, USA

<sup>11</sup> School of Nursing, University of Newcastle, Newcastle, Australia

<sup>12</sup> Health Research Methods, Evidence and Impact, McMaster University, Hamilton, ON, Canada.

<sup>13</sup> Pulmonary, Critical Care, Allergy and Immunologic Diseases, Wake Forest School of Medicine, Winston-Salem, NC, USA

<sup>14</sup> Iberoamerican Cochrane Centre, Barcelona, Spain

<sup>15</sup> Dept of Pediatrics, SickKids, Toronto, ON, Canada

<sup>16</sup> Institute of Social and Preventive Medicine, University of Bern, Bern, Switzerland

<sup>17</sup> Molecular Cell Biology Group, National Heart and Lung Institute, Imperial College of London, London, UK

<sup>18</sup> Division of Genetics, Genomics and Precision Medicine, University of Arizona, Tucson, AZ, USA

<sup>19</sup> Dept of Respiratory Sciences, University of Leicester, Leicester, UK

<sup>20</sup> Respiratory Medicine, Laval University, Quebec, QC, Canada

<sup>21</sup> Division of General Pediatrics, University of California San Francisco, San Francisco, CA, USA

<sup>22</sup> Division of Pulmonary and Critical Care Medicine, Washington University, St Louis, MO, USA

<sup>23</sup> Dept of Respiratory Diseases, University of Aix-Marseille, Marseille, France

<sup>24</sup> Paediatric Allergy, National Heart and Lung Institute, Imperial College of London, London, UK

<sup>25</sup> Respiratory Biomedical Research, University of Southampton, Southampton, UK

<sup>26</sup> Dept of Pediatrics, University Children's Hospital, Basel, Switzerland

<sup>27</sup> European Lung Foundation, Lausanne, Switzerland

<sup>a</sup> is ATS co-chair; ORCID: <https://orcid.org/0000-0003-0979-8234>

<sup>b</sup> ORCID: <https://orcid.org/0000-0002-9731-4828>

<sup>c</sup> ORCID: <https://orcid.org/0000-0002-9949-6012>

<sup>d</sup> ORCID: <https://orcid.org/0000-0001-6115-4343>

<sup>e</sup> ORCID: <https://orcid.org/0000-0001-5865-489X>

<sup>f</sup> ORCID: <https://orcid.org/0000-0001-8464-0547>

<sup>j</sup> is ERS co-chair



- <sup>28</sup> School of Medicine and Public Health, University of Newcastle, Newcastle, Australia
- <sup>29</sup> Division of Pulmonary and Critical Care, University of Wisconsin, Madison, WI, USA
- <sup>30</sup> Dept of Respiratory Medicine, Faculty of Medicine and Graduate School of Medicine, Hokkaido University, Hokkaido, Japan
- <sup>31</sup> Dept of Respiratory and Critical Care Medicine, The Second Affiliated Hospital of Zhejiang University School of Medicine, Hangzhou, China
- <sup>32</sup> Asthma Institute, University of Pittsburgh, Pittsburgh, PA, USA
- <sup>33</sup> Dept of Paediatrics, Imperial College London, National Heart and Lung Institute, London, UK

✉ Fernando Holguin, CU Anschutz Research Complex II, 12700 East 19<sup>th</sup> Avenue, 9C03, Aurora, CO 80045, США; e-mail: fernando.holguin@ucdenver.edu

## Abstract

This document provides clinical recommendations for the management of severe asthma. Comprehensive evidence syntheses, including meta-analyses, were performed to summarise all available evidence relevant to the European Respiratory Society/American Thoracic Society Task Force's questions. The evidence was appraised using the GRADE (Grading of Recommendations, Assessment, Development and Evaluation) approach and the results were summarised in evidence profiles. The evidence syntheses were discussed and recommendations formulated by a multidisciplinary Task Force of asthma experts, who made specific recommendations on six specific questions. After considering the balance of desirable and undesirable consequences, quality of evidence, feasibility, and acceptability of various interventions, the Task Force made the following recommendations:

- suggest using anti-interleukin (IL)-5 and anti-IL-5 receptor  $\alpha$  for severe uncontrolled adult eosinophilic asthma phenotypes;
- suggest using a blood eosinophil cut-point  $\geq 150 \mu\text{L}^{-1}$  to guide anti-IL-5 initiation in adult patients with severe asthma;
- suggest considering specific eosinophil ( $\geq 260 \mu\text{L}^{-1}$ ) and exhaled nitric oxide fraction ( $\geq 19.5$  ppb) cut-offs to identify adolescents or adults with the greatest likelihood of response to anti-IgE therapy;
- suggest using inhaled tiotropium for adolescents and adults with severe uncontrolled asthma despite Global Initiative for Asthma (GINA) step 4 – 5 or National Asthma Education and Prevention Program (NAEPP) step 5 therapies;
- suggest a trial of chronic macrolide therapy to reduce asthma exacerbations in persistently symptomatic or uncontrolled patients on GINA step 5 or NAEPP step 5 therapies, irrespective of asthma phenotype;
- suggest using anti-IL-4/13 for adult patients with severe eosinophilic asthma and for those with severe corticosteroid-dependent asthma regardless of blood eosinophil levels.

These recommendations should be reconsidered as new evidence becomes available.

**Conflict of interest.** F.Holguin has nothing to disclose. J.C.Cardet has nothing to disclose. K.F.Chung has received honoraria for participating in advisory board meetings of GlaxoSmithKline, AstraZeneca, Novartis, Merck, Boehringer Ingelheim, 4D Pharma, Pieris and Teva regarding treatments for asthma, cough and chronic obstructive pulmonary disease and has also been remunerated for speaking engagements. S.Diver has nothing to disclose. D.S.Ferreira reports fellowship MTF 2015-02 from the European Respiratory Society, during the conduct of the study. A.Fitzpatrick has nothing to disclose. M.Gaga reports grants and personal fees from AstraZeneca and Chiesi, grants from Novartis, Menarini and Elpen, personal fees from MSD and BMS, outside the submitted work. L.Kellermeyer has nothing to disclose. S.Khurana reports grants from GlaxoSmithKline and Sanofi, outside the submitted work. S.Knight has nothing to disclose. V.M.McDonald reports grants from GlaxoSmithKline, grants and personal fees for lectures from AstraZeneca, personal fees for educational steering committee work from Menarini, outside the submitted work. R.L.Morgan has nothing to disclose. V.E.Ortega has nothing to disclose. D.Rigau acts as a European Respiratory Society methodologist. P.Subbarao has nothing to disclose. T.Tonia acts as a European Respiratory Society methodologist. I.M.Adcock has nothing to disclose. E.R.Bleecker undertaken clinical trials through his employer, Wake Forest School of Medicine and University of Arizona, for AstraZeneca, MedImmune, Boehringer Ingelheim, Genentech, Johnson and Johnson (Janssen), Novartis, Regeneron and Sanofi Genzyme, and has also served as a paid consultant for AstraZeneca, MedImmune, Boehringer Ingelheim, GlaxoSmithKline, Novartis, Regeneron and Sanofi Genzyme, outside the submitted work. C.Brightling reports grants and personal fees from GlaxoSmithKline, Novartis, Genentech/Roche, Chiesi, 4D Pharma, Glenmark, Boehringer Ingelheim, Mologic, Gossamer and AstraZeneca/MedImmune, personal fees from Sanofi/Regeneron and Teva, outside the submitted work. L.-P.Boulet reports research grants for participation in multicentre studies from AstraZeneca, Boston Scientific, GlaxoSmithKline, Hoffman La Roche, Novartis, Ono Pharma, Sanofi and Takeda; support for research projects submitted by the investigator from AstraZeneca, Boehringer Ingelheim, GlaxoSmithKline, Merck and Takeda; consulting and advisory board work for AstraZeneca, GlaxoSmithKline, Novartis and Methapharm; nonprofit grants for production of educational materials from AstraZeneca, Boehringer Ingelheim, GlaxoSmithKline, Merck Frosst and Novartis; conference fees from AstraZeneca, GlaxoSmithKline, Merck and Novartis; support for participation in conferences and meetings from Novartis and Takeda. M.Cabana reports personal fees for consultancy from Genentech and Novartis, outside the submitted work. M.Castro receives university grant funding from NIH, American Lung Association and PCORI; receives pharmaceutical grant funding from AstraZeneca, Boehringer Ingelheim, Chiesi, GlaxoSmithKline, Novartis and Sanofi-Aventis; is a consultant for Aviragen, Boston Scientific, Genentech, Nuvaira, Neutronic, Therabron, Theravance, Vectura, 4D Pharma, VIDA, Mallinckrodt, Teva and Sanofi-Aventis; is a speaker for AstraZeneca, Boehringer Ingelheim, Boston Scientific, Genentech, Regeneron, Sanofi and Teva; and receives royalties from Elsevier. P.Chanez has undertaken consultancy services for Boehringer Ingelheim, GlaxoSmithKline, AstraZeneca, Novartis, Teva, Chiesi, Sanofi and SNCF, served on advisory boards for Boehringer Ingelheim, GlaxoSmithKline, AstraZeneca, Novartis, Teva, Chiesi and Sanofi, received lecture fees from GlaxoSmithKline, AstraZeneca, Novartis, Teva, Chiesi, Boston Scientific and ALK, and received industry-sponsored grants from AstraZeneca, ALK and Novartis. A.Custovic reports personal fees for consultancy from Novartis, Regeneron/Sanofi, Boehringer Ingelheim and Philips, personal fees for lectures from Thermo Fisher Scientific and Novartis, outside the submitted work. R.Djukanovic reports receiving fees for lectures at symposia organised by Novartis, AstraZeneca and Teva, consultation for Teva and Novartis as member of advisory boards, and participation in a scientific discussion about asthma organised by GlaxoSmithKline; and is a co-founder of and current consultant for, and has shares in, Synairgen, a University of Southampton spin-out company. U.Frey reports personal fees for meeting attendance from GlaxoSmithKline Scientific Advisory Board, outside the submitted work. B.Frankemölle has nothing to disclose. P.Gibson reports grants and personal fees for educational activities from GlaxoSmithKline, grants and personal fees for lectures and educational activities from AstraZeneca, personal fees for educational steering committee work from Novartis and Sanofi, outside the submitted work. D.Hamerlijnck is independent European Federation of Allergy and Airways (EFA) patient advisor to Novartis on patient involvement; patient co-chair of the ERS Severe Heterogeneous Asthma Registry, Patient-centred CRC; member of the scientific advisory board of the Veelbelovende Zorg for ZIN and ZonMw; member of the scientific advisory board of the BENEFIT (ZonMw–KBC Dutch Belgian collaboration); member of the IMI PARADIGM patient advisory group for EPF; member of the scientific advisory board for ERA-NET NEURON Biomarkers; patient reviewer for the Dutch Patient Federation and several

ZonMw scientific committees. *N.Jarjour* reports the following, outside the submitted work: a grant from National Institutes of Health; personal fees for consultation from AstraZeneca and Boehringer Ingelheim. *S.Konno* reports grants from AstraZeneca, Kyorin Pharmaceutical, Japan Allergy Foundation, Novartis and Ministry of Education, Culture, Sports, Science and Technology of Japan, during the conduct of the study. *H.Shen* has nothing to disclose. *C.Vitari* has nothing to disclose. *A.Bush* has nothing to disclose.

**Support statement.** This work was supported by the European Respiratory Society and the American Thoracic Society. Funding information for this article has been deposited with the Crossref Funder Registry.

**Acknowledgement.** With thanks to the European Lung Foundation severe asthma patient advisory group who provided input on patient views and preferences via teleconferences, through their attendance at the ATS and ERS Congresses, and in writing. They contributed to formulating and prioritising the key questions and outcomes. This document was endorsed by the ERS Executive Committee on August 26, 2019, and by the ATS on September 14, 2019.

The guidelines published by the European Respiratory Society incorporate data obtained from a comprehensive and systematic literature review of the most recent studies available at the time. Health professionals are encouraged to take the guidelines into account in their clinical practice. However, the recommendations issued by this guideline may not be appropriate for use in all situations. It is the individual responsibility of health professionals to consult other sources of relevant information, to make appropriate and accurate decisions in consideration of each patient's health condition and in consultation with that patient and the patient's caregiver where appropriate and/or necessary, and to verify rules and regulations applicable to drugs and devices at the time of prescription.

#### ®ERS publications

The ERS/ATS Task Force makes recommendations on the use of novel therapies for severe asthma, specifically biologicals for type 2 high asthma, and antimuscarinic agents and macrolides, as well as on biomarkers for predicting treatment response (<http://bit.ly/2kZLRaD>).

**Disclaimer Acknowledgement.** This translated material has not been reviewed prior to release; therefore the European Respiratory Society may not be responsible for any errors, omissions or inaccuracies, or for any consequences arising there from, in the content. Reproduced with permission of the © ERS, 2021.

*European Respiratory Journal*. 2020; 55 (1): 1900588. DOI: 10.1183/13993003.00588-2019. Published: January 2, 2020.

Translation – Chashnikova E.P.

Translation editor – Chikina S.Yu., Candidate of Medicine

For citation: Holguin F., Cardet J.C., Chung K.F. et al. Management of severe asthma: a European Respiratory Society/American Thoracic Society guideline. *Eur. Respir. J.* 2020; 55: 1900588. DOI: 10.1183/13993003.00588-2019

Первые совместные рекомендации Европейского респираторного (*European Respiratory Society – ERS*) и Американского торакального (*American Thoracic Society – ATS*) обществ по лечению тяжелой бронхиальной астмы (БА) у взрослых и детей школьного возраста опубликованы в 2014 г. [1]. Тяжелая БА определялась согласно следующему критерию [1]:

- если диагноз БА подтвержден и сопутствующие заболевания контролируются, тяжелая БА определяется как «БА, которая требует высоких доз ингаляционных глюкокортикостероидов (иГКС) [...] плюс 2-й препарат базисной терапии (и / или системные ГКС (сГКС)) для предотвращения перехода БА в статус неконтролируемой или БА, которая остается неконтролируемой, несмотря на описанную терапию».

Подчеркнута необходимость подтверждения диагноза БА и исключения других заболеваний со сходной клинической картиной. Кроме того, в рекомендациях признается, что тяжелая БА – это гетерогенное заболевание, имеющее различные фенотипы, такие как тяжелая эозинофильная БА. Даны конкретные рекомендации по использованию уровня эозинофилов в мокроте и фракции оксида азота (NO) в выдыхаемом воздухе ( $F_{ENO}$ ) при выборе терапии. Также сформулированы рекомендации по использованию метотрексата, макролидных антибактериальных препаратов (АБП), противогрибковых средств, бронхиальной термопластики и антител к IgE омализумаба при тяжелой БА.

Работа над настоящими рекомендациями, которые являются совместным проектом ERS / ATS, началась

в 2017 г. в связи с появлением новых препаратов для лечения тяжелой БА, в частности новых биологических препаратов для лечения тяжелой эозинофильной БА. С использованием модели PICO (*Patient population, Intervention, Comparison and Outcome* – Популяция Пациентов, Вмешательство, Сравнение и Исход) сформулированы 6 конкретных важных вопросов. Для оценки силы доказательств и формулирования рекомендаций использовался подход GRADE (*Grading of Recommendations, Assessment, Development and Evaluation* – градация рекомендаций, рассмотрение, формулирование и оценка) [2].

Рабочей группой выбраны и проработаны 6 вопросов (табл. 1).

Вопрос № 6 по модели PICO изначально не планировался к рассмотрению, но во время обсуждений стало ясно, что регуляторными органами будет одобрен блокатор рецептора- $\alpha$  интерлейкина (IL)-4 – IL-4R $\alpha$  дупилумаб, который вмешивается в эффекты IL-4 и IL-13. Эксперты рабочей группы сосредоточились на вопросах по модели PICO и, в отличие от первой рабочей группы, не рассматривали общие стратегии лечения тяжелой БА.

## Методы

Общая методология формулирования вопросов, оценки исходов, отбора исследований, а также оценки совокупности доказательств, формулирования и градации доказательств описана в предыдущих рекомендациях ERS / ATS и дополнительных материалах [3, 4].

**Таблица 1**

**Вопросы, сформулированные совместной рабочей группой по тяжелой бронхиальной астме Европейского респираторного общества и Американского торакального общества**

**Table 1**

**European Respiratory Society/American Thoracic Society Severe Asthma Task Force questions**

|   |                                                                                                                                                                                                                                                                                                                                       |
|---|---------------------------------------------------------------------------------------------------------------------------------------------------------------------------------------------------------------------------------------------------------------------------------------------------------------------------------------|
| 1 | Следует ли применять моноклональные антитела к IL-5 у взрослых и детей* с тяжелой БА?                                                                                                                                                                                                                                                 |
| 2 | Следует ли принимать решение о начале терапии моноклональным антителом к IL-5 или IL-5Rα у взрослых и детей с тяжелой БА в зависимости от уровня какого-либо биомаркера? (рассматриваются следующие биомаркеры: F <sub>ENO</sub> , количество эозинофилов в мокроте или в периферической крови, сывороточный периостин)               |
| 3 | Следует ли принимать решение о начале терапии моноклональным антителом к IgE у взрослых и детей с тяжелой БА в зависимости от уровня какого-либо биомаркера в дополнение к общему уровню IgE? (рассматриваются следующие биомаркеры: F <sub>ENO</sub> , число эозинофилов в мокроте или периферической крови, сывороточный периостин) |
| 4 | Следует ли применять ингаляционные M-холиноблокаторы длительного действия у взрослых и детей с тяжелой БА?                                                                                                                                                                                                                            |
| 5 | Следует ли применять макролиды (а именно – азитромицин, кларитромицин) у взрослых и детей с тяжелой БА?                                                                                                                                                                                                                               |
| 6 | Следует ли применять моноклональные антитела к IL-4Rα у взрослых и детей с тяжелой БА?                                                                                                                                                                                                                                                |

Примечание: БА – бронхиальная астма; IL – интерлейкин; R – рецепторы; F<sub>ENO</sub> – фракция оксида азота в выдыхаемом воздухе; \* – данные рекомендации предназначены для больных старше 5 лет.

Note: \*, for the purposes of this guideline, age > 5 years.

### Состав группы

Экспертами ERS и ATS выбраны сопредседатели рабочей группы (F. Holguin и A. Bush), которые руководили проектом и отобраны остальные эксперты, – клиницисты ( $n = 23$ ) и исследователи с опытом ведения больных тяжелой БА, а также представители пациентов ( $n = 2$ ) с тяжелой БА (B. Frankemolle и D. Hamerlijnc). Методологи (D. Rigau и R. L. Morgan) под руководством старшего методолога ERS (T. Tonia) контролировали ход проекта и обеспечивали соблюдение всех методологических требований. Систематический обзор и применение подхода GRADE осуществляли члены рабочей группы (D. S. Ferreira и S. Diver) и сторонний участник (Ибероамериканский Кохрейновский центр, Барселона, Испания). Методологи принимали участие в собраниях рабочей группы, но не привлекались к составлению рекомендаций и не имели права голоса.

Сопредседатели и эксперты обсуждали доказательства и составляли рекомендации. Для облегчения обсуждения использовались профили доказательств и обоснования рекомендаций в виде таблиц (дополнительный материал), составленные с использованием инструмента для разработки рекомендаций GRADEpro (<https://grade.pro.org>). После обсуждения проводилось голосование по рекомендациям. Все члены группы раскрыли конфликты интересов. Оба сопредседателя не имели конфликтов интересов, связанных с лечением БА, в соответствии с требованиями к составу рабочей группы. Члены группы с соответствующими конфликтами интересов принимали участие в обсуждении доказательств, но не участвовали в составлении рекомендаций в отношении вопросов, по которым у них имелись конфликты интересов.

Использовались следующие минимальные клинически значимые различия (*minimum clinically important difference*) между группами лечения, преимущественно взрослых пациентов, (которые использовали для оценки случайной погрешности по GRADE) – из-

менения по Респираторному вопроснику больницы Св. Георгия (*St. George's Respiratory Questionnaire – SGRQ*) на 4 балла, Вопроснику контроля над БА (*Asthma Control Questionnaire; ACQ-5, ACQ-6 и ACQ-7*) на 0,5 балла, Вопроснику для оценки качества жизни (КЖ) *Asthma Quality of Life Questionnaire (AQLQ)* на 0,5 балла и изменение объема форсированного выдоха за 1-ю секунду (ОФВ<sub>1</sub>) на 0,23 л (отклонение на 10,38 %<sub>исх.</sub>) [5–7].

### Поиск литературы

Библиотекарями (Sh. Knight и L. Kellermeyer) проведен поиск публикаций в базах готовящихся к публикации и других неиндексированных статей MEDLINE *In-Process & Other Non-Indexed Citations*, базах MEDLINE, EMBASE и Кохрейновском центральном регистре контролируемых исследований за период с 2008 г. по 27.09.18 (последнее обновление данных). Даты выбраны таким образом, чтобы охватить новые разработки в области терапии тяжелой БА с момента публикации предыдущих рекомендаций ERS / ATS. В ходе поиска отбирались также систематические обзоры рандомизированных клинических исследований (РКИ) в популяциях больных БА средней или тяжелой степени, которые получали лечение, представляющее интерес для рабочей группы. В обзор не включались исследования I фазы (фармакокинетики и фармакодинамики), нерандомизированные дополнительные исследования в условиях реальной клинической практики и исследования, представленные только в формате резюме (например, постеры или тезисы конгрессов).

В обзор включались только клинические исследования и только публикации на английском языке. Каждая стратегия поиска включала заголовки по медицинской теме и слова в тексте по теме БА с ограничениями поиска в соответствии с концепциями, определенными по модели PICO. В дополнение к поиску по электронным базам данным члены рабочей группы обращались за консультацией к экспертам и проводили поиск по спискам литературы вручную.



## Оценка совокупности доказательств

Из публикаций по каждому исследованию извлекались характеристики исследования, тип участников, вмешательства, показатели исходов и результаты. Если данные были пригодны для объединения, эффекты оценивались путем метаанализа с помощью программы *Review Manager* версии 5.3 (*The Nordic Cochrane Centre*, Копенгаген, Дания). Для метаанализа использовалась модель случайных эффектов, если не указано иное. Дихотомические исходы представлены в формате относительных рисков (ОР), а непрерывные — в формате средних различий, если не указано иное. Абсолютные различия указаны в сопутствующих документах дополнительных материалах. Качество доказательств проверено членами рабочей группы и валидизировано методологами ERS (*T. Tonia, D. Rigau* и *R. L. Morgan*).

## Составление и графация рекомендаций

Профили доказательств отправлены рабочей группе для ознакомления. Рекомендации сформулированы с использованием циклического процесса достижения согласия в формате личных встреч, телеконференций, переписки по электронной почте и итогового голосования всех членов рабочей группы, у которых отсутствовал конфликт интересов, а также с учетом соотношения желательных (польза) и нежелательных (бремя заболевания, побочные эффекты и стоимость) последствий, вмешательства, качества доказательств, ценностей и предпочтений пациентов и доступности вмешательства.

Рекомендация «за» или «против» вмешательства считалась сильной, если эксперты были уверены, что желательные последствия ее применения превосходят нежелательные. Сильная рекомендация — та, которой будут следовать большинство хорошо информированных пациентов.

Рекомендация «за» или «против» вмешательства считалась слабой, если эксперты не были уверены, что желательные последствия ее применения превосходят нежелательные. Причинами неуверенности рекомендации могли быть низкое или очень низкое качество доказательств, небольшая разница между желательными и нежелательными последствиями, неполное соответствие популяции больных в исследовании критериям тяжелой БА (согласно критериям ERS / ATS) или предпочтения пациентов. Слабая рекомендация означает, что хорошо информированные пациенты могут принять разные решения о применении данного вмешательства.

## Составление текста рекомендаций

Первоначальный вариант рекомендаций составили 2 сопредседателя, методологи ERS и 1 эксперт (*Kian Fan Chung*). Таблицы с обоснованием рекомендаций представлены в дополнительных материалах. Все материалы отрецензированы и одобрены всеми членами рабочей группы.

В дополнительных материалах можно найти вспомогательную документацию, включая профили доказательств GRADE и таблицы с обоснованием рекомендаций.

## Результаты

### Вопрос 1. Следует ли применять моноклональные антитела к IL-5 у взрослых и детей с тяжелой БА?

IL-5 — основной цитокин, инициирующий эозинофильное воспаление при БА. По результатам РКИ показано, что при использовании моноклональных антител к IL-5 (меполизумаб, реслизумаб) или его рецептору IL-5R $\alpha$  (бенрализумаб) эффективно улучшаются исходы лечения БА. Эти препараты одобрены Федеральным агентством лекарственных средств США (*US Federal Drug Administration* — FDA) и Европейским агентством лекарственных средств (*European Medicines Agency* — EMA). Обнаружены 12 РКИ, соответствующие критериям отбора [8–19], в которые были включены данные только тех участников, которые получали одобренные FDA / EMA дозы или дозу 20 мг подкожно в исследованиях бенрализумаба II фазы. В следующем разделе кратко представлены результаты метаанализа этих исследований. В понятие «крайне важные исходы» включены обострения БА, симптомы, контроль над БА, КЖ, применение системных сГКС и нежелательные явления (НЯ). Изменение функции легких считалось важным исходом.

## Обзор доказательств

### Меполизумаб

Критериям отбора соответствовали 3 исследования с участием подростков и взрослых [8–10]. Все 3 работы представляли собой плацебо-контролируемые РКИ (РПКИ) с участием больных тяжелой эозинофильной БА (уровень эозинофилии в крови  $\geq 300$  кл. / мкл за 12 мес. до скрининга или  $\geq 150$  кл. / мкл — во время скрининга / периода оптимизации терапии пероральными ГКС (оГКС)). Эксперты рабочей группы считают такие выборки репрезентативными по отношению к популяции больных тяжелой БА, соответствующей определению из рекомендаций ERS / ATS по тяжелой БА. В 2 исследованиях пациенты переносили как минимум 2 обострения за предшествующий год, несмотря на регулярное применение высоких доз ингаляционных ГКС (иГКС) вместе с еще одним препаратом базисной терапии [9, 10], а в 3-м исследовании изучалась возможность снижения дозы ГКС на фоне терапии меполизумабом при ГКС-зависимой БА [8].

Терапия меполизумабом сопровождалась снижением частоты любых обострений на 50 % (отношение шансов (ОШ) — 0,5; 95%-ный доверительный интервал (ДИ) — 0,39–0,65; абсолютный риск — 0,92 vs 1,69 события на 1 пациента в год) и снижением частоты обострений, при которых требовались обращение за неотложной помощью или госпитализация, на 64 % (ОШ — 0,36; 95%-ный ДИ — 0,20–0,66; абсолютный риск — 0,05 vs 0,15 события на 1 пациента в год). У пациентов, полу-



чавших меполизумаб, отмечено абсолютное снижение на 0,43 балла по вопроснику ACQ-5 (95%-ный ДИ – от –0,56 до –0,31 балла) (т. е. улучшение) по сравнению с пациентами, получавшими плацебо, и абсолютное снижение на 7,14 балла по вопроснику SGRQ (95%-ный ДИ – от –9,07 до –5,21 балла) (т.е. улучшение).

При применении меполизумаба в исследовании [8] ( $n = 135$ ) поддерживающая доза оГКС снизилась на 50 % (95%-ный ДИ – 20–75 %) по сравнению с плацебо. Влияние меполизумаба на ОФВ<sub>1</sub> было меньше минимально клинически значимой разницы.

### Реслизумаб

Критериям отбора соответствовали 4 публикации, которые охватывали 5 РКИ [11–14]. *M. Castro et al.* [13] описаны 2 дублирующих исследования, в 3 из 5 РКИ были включены не только взрослые больные, но и подростки [11, 13]. Во все исследования, кроме [12], были включены пациенты как со среднетяжелой, так и с тяжелой БА. В 3 РКИ критерием включения явился уровень эозинофилии в крови  $\geq 400$  кл. / мкл [11, 13, 14], в 1 РКИ – уровень эозинофилов в мокроте  $\geq 3$  % [12]. В 1 РКИ при отборе пациентов не учитывался уровень эозинофилии в крови, но впоследствии проведен анализ в подгруппах с пороговым значением эозинофилов 400 кл. / мкл [14]. В целом терапия реслизумабом сопровождалась снижением частоты любых обострений на 54 % (ОШ – 0,46; 95%-ный ДИ – 0,37–0,58; абсолютный риск – 0,84 vs 1,81 события на 1 пациента в год) по сравнению с плацебо и снижением частоты обострений, при которых требовались обращение за неотложной помощью или госпитализация, на 33 % (ОШ – 0,67; 95%-ный ДИ – 0,39–1,17; абсолютный риск – 0,077 vs 0,12 события на 1 пациента в год). При терапии реслизумабом также снижался риск развития как минимум 1 обострения (29,2 % vs 46,7 %; отношение рисков (ОР) – 0,63; 95%-ный ДИ – 0,53–0,76). В исследовании, участники которого соответствовали критериям тяжелой БА (согласно критериям ERS / ATS), терапия реслизумабом сопровождалась снижением риска развития обострений на 60 % (7,5 % vs 18,9 %; ОР – 0,40; 95%-ный ДИ – 0,13–1,20).

У пациентов, получавших реслизумаб по сравнению с получавшими плацебо, отмечено абсолютное снижение по ACQ-7 (т. е. улучшение) на 0,26 балла (95%-ный ДИ – от –0,33 до –0,18 балла) и абсолютное повышение по вопроснику AQLQ (т. е. улучшение) на 0,28 балла (95%-ный ДИ – 0,17–0,39 балла). Влияние реслизумаба на ОФВ<sub>1</sub> не превысило минимально клинически значимую разницу.

### Бенрализумаб

Критериям отбора соответствовали 5 РКИ бенрализумаба [15–19]. В 4 исследования набирались больные как среднетяжелой, так и тяжелой БА [15–18]. В 2 из 5 РКИ были включены не только взрослые больные, но и подростки [15, 17]. Возможность снижения дозы ГКС на фоне терапии бенрализумабом при ГКС-зависимой БА изучалась в работе [18].

В целом терапия бенрализумабом сопровождалась снижением частоты любых обострений на 42 % (ОШ – 0,58; 95%-ный ДИ – 0,47–0,73; абсолютный риск – 0,64 vs 1,19 события на 1 пациента в год) и снижением числа пациентов с обострением на 38 % (35,9 % vs 51,1 %; ОР – 0,62; 95%-ный ДИ – 0,36–1,06) по сравнению с плацебо. В исследовании, участники которого соответствовали критериям тяжелой БА ERS / ATS, терапия бенрализумабом сопровождалась снижением частоты обострений на 55 % (число больных с обострениями – 23,3 % vs 52 %; ОР – 0,45; 95%-ный ДИ – 0,28–0,72). Число пациентов, которые обращались за неотложной помощью или были госпитализированы, также снизилось (ОШ – 0,45; 95%-ный ДИ – 0,14–1,47; абсолютный риск – 0,043 vs 0,18 события на 1 пациента в год), особенно в подгруппе больных, соответствующих критериям тяжелой БА ERS / ATS (ОШ – 0,07; 95%-ный ДИ – 0,01–0,63; абсолютный риск – 0,02 vs 0,32 события на 1 пациента в год).

У пациентов, получавших бенрализумаб по сравнению с плацебо, отмечено абсолютное снижение показателя по ACQ-6 (т. е. улучшение) на 0,29 балла (95%-ный ДИ – от –0,4 до –0,17 балла) и абсолютное повышение – по вопроснику AQLQ (т. е. улучшение) на 0,32 балла (95%-ный ДИ – 0,19–0,45). Влияние бенрализумаба на ОФВ<sub>1</sub> был ниже минимально клинически значимой разницы. Медиана снижения дозы оГКС к заключительному визиту (28-я неделя) по сравнению исходным уровнем (диапазон) составила 25,0 % (от –150 до –100 %) в группе плацебо ( $n = 75$ ) и 75,0 % (от –50 до –100 %) – в группе бенрализумаба ( $n = 73$ ) [18].

### Побочные эффекты

ОР развития любого НЯ при применении меполизумаба по сравнению с плацебо составило 0,93 (95%-ный ДИ – 0,88–0,99; 74,8 % vs 79,6 %), при применении реслизумаба – 0,88 (95%-ный ДИ – 0,81–0,96; 67,1 % vs 80,4 %); при применении бенрализумаба – 0,96 (95%-ный ДИ – 0,91–1,01; 73,6 % vs 75,5 %). Аналогичным образом, при терапии антителами к IL-5 риск серьезных НЯ был ниже (см. дополнительные материалы). Вероятно, меньший риск развития любых НЯ связан со снижением числа тяжелых обострений БА на фоне этой терапии.

Данные по связанным с исследуемым препаратом НЯ представлены по всем 3 исследованиям меполизумаба, но только по 2 из 5 исследований реслизумаба и по 1 из 5 исследований бенрализумаба. Эти данные показывают, что по сравнению с плацебо на фоне применения меполизумаба риск связанных с терапией НЯ повышался (13,3 % vs 9,2 %; ОР – 1,35; 95%-ный ДИ – 1,01–1,80), на фоне применения реслизумаба – понижался (8 % vs 11,9 %; ОР – 0,69; 95%-ный ДИ – 0,44–1,09), а на фоне применения бенрализумаба – повышался (13,3 % vs 9,2 %; ОР – 1,46; 95%-ный ДИ – 0,96–2,21). Поскольку конечные показатели по связанным с терапией НЯ не были заранее определены, членами рабочей группы при общей оценке

убедительности доказательств эффективности препаратов этот показатель не учитывался.

### Преимущества

При применении антител к IL-5 и IL-5R $\alpha$  снижается частота осложнений и госпитализаций у больных тяжелой эозинофильной БА; при использовании меполизумаба и бенрализумаба у больных тяжелой ГКС-зависимой БА эффективно снижается поддерживающая доза оГКС.

### Нежелательные явления

Все 3 препарата антител к IL-5 переносились хорошо. Частота НЯ была близка к таковой в группах плацебо.

### Выводы

При терапии антителами к IL-5 снижается частота обострений у больных тяжелой эозинофильной БА. При использовании меполизумаба и бенрализумаба эффективно снижается доза оГКС у больных ГКС-зависимой БА. Влияние на контроль над БА, КЖ и ОФВ<sub>1</sub> являются умеренными для всех препаратов и не достигают минимально клинически значимой разницы.

### Дальнейшие направления исследований

Для выбора оптимального препарата антител к IL-5 для конкретного пациента требуются прямые сравнительные исследования. Эксперты не могут прийти к единому мнению о том, какой биомаркер и какое пороговое значение эозинофилов в крови лучше всего прогнозируют эффективность терапии антителами к IL-5. Эффективность этой терапии зависит не только от уровня эозинофилов в крови, но и от тяжести предшествующих обострений БА. Это следует учитывать при оценке клинической и экономической эффективности терапии. Отсутствуют данные по применению меполизумаба и реслизумаба у подростков, а по бенрализумабу доступны лишь данные по ограниченному числу подростков с тяжелой БА. Отсутствуют данные по эффективности терапии антителами к IL-5 у детей младшего возраста (до 5 лет). Таким образом, требуются дополнительные доказательства для разработки высококачественных рекомендаций для педиатрической практики.

### Мнения других экспертов

В Глобальной инициативе по БА (*Global Initiative for Asthma* – GINA, 2019) [20] и рекомендации по апробированию технологий Национального института здоровья и клинического совершенствования Великобритании (*National Institute of Health and Clinical Excellence* – NICE) [21–23] меполизумаб, реслизумаб и бенрализумаб рекомендуются как дополнительная терапия тяжелой эозинофильной БА (5-я ступень терапии по GINA).

### Рекомендация ERS / ATS

Предлагается использовать антитела к IL-5 в качестве дополнительной терапии у взрослых с тяжелой неконтролируемой БА с эозинофильным фенотипом и больных тяжелой ГКС-зависимой БА (эксперты рабочей группы посчитали эту рекомендацию слабой, поскольку критерии включения ERS / ATS в различных исследованиях не всегда соответствовали определению тяжелой БА).

### Примечания

Врачу следует соотнести высокую стоимость антител к IL-5 и к IL-5R $\alpha$ , их влияние на экономическую эффективность и доступность такой терапии с клинической пользой [24]. В связи с ограниченными данными по подросткам и детям эксперты рабочей группы не смогли сформулировать рекомендацию по применению антител к IL-5 и IL-5R $\alpha$  в этих возрастных группах.

**Вопрос 2. Следует ли принимать решение о начале терапии моноклональным антителом к IL-5 или IL-5R $\alpha$  у взрослых и детей с тяжелой БА в зависимости от уровня какого-либо биомаркера (рассматриваются следующие биомаркеры:  $F_{ENO}$ , число эозинофилов в мокроте или в периферической крови, сывороточный периостин)?**

### Обзор доказательств

Обнаружены 12 РКИ терапии антителами к IL-5 у детей и взрослых в возрасте от 12 до 75 лет, по данным которых проводился ретроспективный анализ ответа на терапию в подгруппах больных с высоким или низким уровнем эозинофилов в крови или мокроте [10–17, 19, 25, 26]. Исследование [26] представляло собой метаанализ 2 РКИ влияния меполизумаба в комбинации 100 мг подкожно и 75 мг – внутривенно на уровень эозинофилии крови. Примечательно, что в исследования [11–13, 25] включались только пациенты с эозинофильной БА (уровень эозинофилов в мокроте  $\geq 3\%$  или в крови  $\geq 200$  кл. / мкл). В исследованиях [10, 11, 13, 15, 17, 26] принимали участие дети в возрасте не моложе 12 лет. Наиболее часто используемым биомаркером являлся уровень эозинофилии в крови. Только в исследовании [12] уровень эозинофилии измерялся в мокроте. В исследовании [27] изучался вопрос о том, является ли персистирующая эозинофилия крови или мокроты показателем неэффективности терапии и обоснованием для добавления альтернативного анти-IL-5 препарата.

Пороговые значения исходного уровня эозинофилов в крови и, следовательно, определение эозинофилии, различались для разных анти-IL-5 препаратов. В исследованиях эффективности меполизумаба пороговое значение уровня эозинофилов в крови составляло  $\geq 150$  кл. / мкл. При применении меполизумаба у пациентов с уровнем эозинофилов в крови  $\geq 500$  кл. / мкл наблюдалось снижение числа обостре-

ний на 73 % (95%-ный ДИ – от –82 до –59 %) и на 36–39 % – во всех других группах пациентов с уровнем эозинофилов в крови  $\geq 150$  кл. / мкл. Примечательно, что примерно  $\frac{3}{4}$  популяции больных тяжелой БА в этих исследованиях составили пациенты с уровнем эозинофилов  $\geq 150$  кл. / мкл. У пациентов с исходным уровнем эозинофилов  $\geq 400$  кл. / мкл, получавших реслизумаб, число обострений уменьшилось на 54 %. Повышение пороговых значений эозинофилии не сопровождалось более выраженным снижением числа обострений. При применении бенрализумаба значимое снижение числа обострений было достигнуто при пороговом значении эозинофилии  $\geq 300$  кл. / мкл, однако осталось неясным, какое пороговое значение можно считать оптимальным, поскольку число обострений снижалось даже у пациентов с уровнем эозинофилов  $< 300$  кл. / мкл.

Влияние разных анти-IL-5-препаратов на контроль над БА и КЖ также различалось. Среди пациентов с исходным уровнем эозинофилов  $\geq 150$  кл. / мкл снижение показателей по вопроснику ACQ-5 на  $\geq 0,5$  балла по сравнению с исходным наблюдалось у 63 % пациентов, получавших меполизумаб, и 41 % получавших плацебо (ОР – 1,53; 95%-ный ДИ – 1,27–1,84). Аналогичное улучшение контроля над БА достигнуто у больных с более высоким исходным уровнем эозинофилов ( $\geq 300$  или  $\geq 500$  кл. / мкл). В исследованиях бенрализумаба только у пациентов с исходным уровнем эозинофилов  $\geq 300$  кл. / мкл наблюдалось значимое улучшение контроля над БА, которое оценивалось по изменению показателя ACQ-6 относительно исходного уровня (среднее различие – 0,28 балла; 95%-ный ДИ – от –0,15 балла), а у пациентов с уровнем эозинофилов  $< 300$  кл. / мкл значимого улучшения не наблюдалось (среднее различие – 0,20 балла; 95%-ный ДИ – от –0,44 до –0,3 балла). Как и для реслизумаба, пороговое значение эозинофилов  $\geq 400$  кл. / мкл ассоциировалось с улучшением контроля над БА (показатель по ACQ-7 уменьшился в среднем на 0,27 балла по сравнению с исходным уровнем; 95%-ный ДИ – от –0,36 до –0,19 балла), в то время как у пациентов с уровнем эозинофилов  $< 400$  кл. / мкл значимый эффект не получен (–0,12 балла; 95%-ный ДИ – от –0,33 до –0,09 балла). Уровень эозинофилии в мокроте оценивался только в 1 исследовании реслизумаба [12] с пороговым значением 10 %. Между группами не получено статистически значимого различия по контролю над БА. Отмечена тенденция, что более высокий уровень эозинофилии в крови ассоциировался с более выраженным улучшением контроля над БА.

По результатам исключенного из метаанализа исследования [27] оценивалась эффективность лечения реслизумабом (внутривенно) в дозе, скорректированной по массе тела, у пациентов, которые ранее получали меполизумаб в дозе 100 мг подкожно. Сообщалось, что у ответивших на лечение реслизумабом больных после терапии меполизумабом установлена стойкая эозинофилия ( $> 300$  кл. / мкл в крови и  $> 3$  % – в мокроте). Этим пациентам реслизумаб вводился в дозе, скорректированной по массе тела. При применении

реслизумаба в дальнейшем уменьшались симптомы и снижалась эозинофилия. Согласно этим данным показано, что доказательства неконтролируемого эозинофильного воспаления, которое проявляется эозинофилией в мокроте или крови, могут использоваться для идентификации пациентов, которые получают улучшение от дополнительной анти-IL-5-терапии, однако этот вывод требует подтверждения.

### Преимущества

Пороговое значение уровня эозинофилов в крови, которое позволяет прогнозировать улучшение контроля над БА и снижение числа обострений, различается для разных анти-IL-5-препаратов. Однако опубликованы доказательства очень низкого качества, что при использовании меполизумаба у пациентов с исходным уровнем эозинофилов в крови  $\geq 500$  кл. / мкл в большей степени снижается число обострений по сравнению с лицами с исходным уровнем эозинофилов в крови  $< 150$  (от 150 до  $< 300$  и от 300 до  $< 500$  кл. / мкл).

### Нежелательные явления

Побочные эффекты бенрализумаба и реслизумаба оценивались по результатам 5 исследований [11, 13–17]. Данные по меполизумабу не позволяют выявить различия в частоте НЯ у пациентов с разным уровнем эозинофилов в крови. При применении бенрализумаба не выявлено различий по частоте НЯ между пациентами с более высоким или более низким уровнем эозинофилов. В исследования по эффективности применения реслизумаба набирались только пациенты с исходным уровнем эозинофилов  $\geq 400$  кл. / мкл. Меньше всего НЯ зарегистрировано в группе больных с отсутствием данных об уровне эозинофилов на момент включения в исследование по сравнению с лицами с исходным уровнем эозинофилов  $\geq 400$  кл. / мкл. При уровне эозинофилов  $\geq 400$  кл. / мкл число НЯ составило  $< 5$  %, что, хотя и является статистически достоверным, но не имеет клинического значения. По данным более поздних исследований показан приемлемый профиль безопасности при длительном применении как бенрализумаба, так и меполизумаба ( $\leq 2$  и  $\leq 4,5$  года соответственно) [28, 29].

### Дополнительная информация

При проведении большинства исследований в качестве основного биомаркера использовались эозинофилы крови, тогда как данные по числу эозинофилов в мокроте ограничены, а данные по  $F_{ENO}$  и сыровоточному периостину полностью отсутствуют. Число эозинофилов в крови можно подчитать в любой стандартной лаборатории, что облегчает его использование в качестве биомаркера. Кроме того, для уточнения исходного уровня могут потребоваться дополнительные анализы, в особенности у пациентов, которые принимают или недавно принимали сГКС. Эти исследования более доступны, чем определение уровня эозинофилов в мокроте, которое в настоящее время



выполняется только в специализированных центрах. Следует отметить, что эозинофилия периферической крови может быть вызвана не только атопией (но и, например, паразитарными инфекциями), в особенности у людей с низким и средним уровнем дохода.

Пороговые значения для оценки эффективности лечения различались в исследованиях разных анти-IL-5-препаратов, а данные по сравнению терапевтических режимов с использованием разных пороговых значений отсутствуют. Наконец, при большинстве режимов терапии антителами к IL-5 используются фиксированные дозы препаратов, установленные по данным РКИ, что подразумевает достижение плато кривой «доза–ответ». Однако по результатам исследования [27] высказано предположение, что эозинофилия, персистирующая на фоне терапии антителами к IL-5, должна рассматриваться как основание к добавлению реслизумаба в дозе, скорректированной по массе тела.

### Выводы и дальнейшие направления исследований

Хотя полученные данные позволяют предположить, что терапия антителами к IL-5 более эффективна при более высоком уровне эозинофилии крови, отсутствуют доказательства того, что определенный уровень эозинофилии в крови ( $\geq 150$  кл. / мкл – для меполизумаба,  $\geq 300$  кл. / мкл – для бенрализумаба и  $\geq 400$  кл. / мкл – для реслизумаба) является абсолютным пороговым значением, поскольку клиническое улучшение возможно у некоторых больных с меньшим числом эозинофилов крови. Исходя из имеющихся доказательств (число которых весьма ограничено), уровень эозинофилии в мокроте не может усиливать прогноз эффективности терапии, основанный на числе эозинофилов в крови.

При установлении исходного уровня эозинофилов может потребоваться несколько измерений, поскольку этот биомаркер характеризуется высокой вариабельностью и существенно снижается при использовании сГКС и иГКС. Неизвестно, позволяет ли число эозинофилов, подсчитанных в период обострения БА, более точно прогнозировать эффективность терапии, чем этот же показатель в период клинической стабильности. Требуется поиск дополнительных неинвазивных биомаркеров для взрослых и детей, которые можно использовать в любом медицинском учреждении для прогнозирования эффективности терапии различными антителами к IL-5.

### Мнения других экспертов

GINA (2019) [20] рекомендуется применение антител к IL-5 и IL-5R $\alpha$  у пациентов с БА, не контролируемой на 4-й или 5-й ступенях терапии и эозинофилией крови  $\geq 300$  кл. / мкл.

### Рекомендация ERS / ATS

Имеется предположение, что пороговое значение числа эозинофилов в крови  $\geq 150$  кл. / мкл можно

использовать как критерий для начала терапии антителами к IL-5 у взрослых пациентов с тяжелой БА и обострениями БА в анамнезе (слабая рекомендация, доказательства низкого качества).

### Примечания

Экспертами рабочей группы придается большее значение снижению числа обострений и доступности биомаркера и меньшее – стоимости и инвазивности.

**Вопрос 3. Следует ли принимать решение о начале терапии моноклональным антителом к IgE у взрослых и детей с тяжелой БА в зависимости от уровня специфических биомаркеров, помимо общего уровня IgE (рассматриваются следующие биомаркеры:  $F_{ENO}$ , число эозинофилов в мокроте и в периферической крови, сывороточный периостин)?**

### Обзор доказательств

Выявлены 3 двойных слепых РПКИ [31–33], в которые набирались пациенты в возрасте 12–75 лет. В качестве доказательной базы для составления рекомендаций рабочей группой использовались данные 2 из этих исследований ( $n = 1\,014$ ) [32, 33]. В эти 2 исследования были включены пациенты с неконтролируемой БА. В исследовании [33] у больных сохранялись неконтролируемые симптомы на фоне применения иГКС с дополнительным базисным препаратом или без такового. В исследование [32] набирались только больные тяжелой персистирующей БА, которая оставалась неконтролируемой на фоне терапии иГКС и длительно действующими  $\beta_2$ -агонистами (ДДБА). В обоих исследованиях пациенты были рандомизированы в соотношении 1 : 1 для лечения омализумабом или плацебо соответственно. Доза омализумаба определялась по сывороточному уровню общего IgE до начала лечения (МЕ / мл) и массе тела (кг) согласно европейской [33] или американской [32] таблицам дозирования омализумаба, что соответствовало минимальной дозе омализумаба  $0,008$  мг / (кг  $\times$  IgE) (МЕ / мл) – каждые 2 нед. или  $0,016$  мг / (кг  $\times$  IgE) (МЕ / мл) – каждые 4 нед.

*W. Busse et al.* [33] спланирован анализ, при проведении которого пациенты рандомизированы на 2 подгруппы по числу эозинофилов при скрининге – низкому ( $< 300$  кл. / мкг) и высокому ( $\geq 300$  кл. / мкг). *N.A. Hanania et al.* [32] проводился анализ в подгруппах с высокими и низкими показателями (низкий уровень  $F_{ENO} < 19,5$  ppb, высокий –  $\geq 19,5$  ppb); низкий уровень эозинофилии в периферической крови составлял  $< 260$  кл. / мкл, высокий –  $\geq 260$  кл. / мкл; низкий сывороточный уровень периостина –  $< 50$  нг / мл, высокий –  $\geq 50$  нг / мл.

Объединить данные этих 2 исследований было невозможно. *W. Busse et al.* [33] получено значимое снижение частоты обострений (ОР – 0,41; 95%-ный ДИ – 0,20–0,84) и клинически незначимое, но статистически достоверное повышение ОФВ<sub>1</sub> (%<sub>долж.</sub>)



через 24 нед. лечения (средняя разница – 7,35; 95%-ный ДИ – 1,38–13,31) при применении омализумаба по сравнению с плацебо у пациентов с высокой эозинофилией при отсутствии различий для лиц с низким уровнем эозинофилов (< 300 кл. / мкл). В исследовании *N.A. Hanania et al.* [32] в течение 48 нед. наблюдения больных с высоким уровнем эозинофилов ( $\geq 260$  кл. / мкл) обострение БА развивалось позже на фоне терапии омализумабом по сравнению с плацебо (ОР – 0,65; 95%-ный ДИ – 0,48–0,85). В то же время у пациентов с низким уровнем эозинофилов (< 260 кл. / мкл) таких различий не наблюдалось (ОР – 0,95; 95%-ный ДИ – 0,68–1,33). Однако между этими подгруппами статистически значимых различий не отмечено. У пациентов с высокой эозинофилией ( $\geq 260$  кл. / мкл), принимавших омализумаб, показатель AQLQ через 48 нед. наблюдения достоверно не изменился по сравнению с плацебо (средняя разница – 0,14 балла; 95%-ный ДИ – от –0,11 до –0,30 балла). В подгруппе пациентов с низким уровнем эозинофилов (< 260 кл. / мкл) отмечена небольшая статистически достоверная, но клинически незначимая динамика этого показателя (средняя разница – 0,26 балла; 95%-ный ДИ – от 0,06 до –0,46 балла).

По результатам анализа показателей  $F_{ENO}$  в подгруппах больных выявлено значимое относительное снижение частоты обострений при применении омализумаба по сравнению с плацебо у пациентов с высоким уровнем  $F_{ENO}$  ( $\geq 19,5$  ppb) (53 %; 95%-ный ДИ – 37–70 %) при отсутствии различий для пациентов с низким уровнем  $F_{ENO}$  (< 19,5 ppb) (16 %; 95%-ный ДИ – от –32 до –46 %) [32]. В течение 48 нед. наблюдения на фоне терапии омализумабом у пациентов с высоким уровнем  $F_{ENO}$  ( $\geq 19,5$  ppb) отмечен значимо более продолжительный период до 1-го обострения БА по сравнению с плацебо (ОР – 0,38; 95%-ный ДИ – 0,24–0,60) при отсутствии различий для больных с низким уровнем  $F_{ENO}$  (< 19,5 ppb) (ОР – 1,00; 95%-ный ДИ – 0,62–1,61). У пациентов с высоким уровнем  $F_{ENO}$  ( $\geq 19,5$  ppb) также в большей степени изменился средний показатель AQLQ в течение 48 нед. наблюдения при применении омализумаба по сравнению с плацебо (средняя разница – 0,39 балла; 95%-ный ДИ – 0,06–0,72 балла), в то время как при низком уровне  $F_{ENO}$  (< 19,5 ppb) такой динамики не наблюдалось (средняя разница – 0,24 балла; 95%-ный ДИ – от –0,09 до –0,57 балла).

Между пациентами с высоким ( $\geq 50$  нг / мл) и низким (< 50 нг / мл) уровнями периостина не отмечено различий по относительному снижению частоты обострений или динамике  $ОФВ_1$  в течение 48 нед. на фоне терапии омализумабом либо плацебо [32]. Однако при назначении омализумаба улучшалось КЖ по AQLQ по сравнению с плацебо при низком уровне периостина (< 50 нг / мл) на 48 нед. последующего наблюдения (средняя разница – 0,50 балла; 95%-ный ДИ – 0,22–0,78 балла), в то время как при высоком уровне периостина ( $\geq 50$  нг / мл) таких различий не наблюдалось (средняя разница – 0,10 балла; 95%-ный ДИ – от –0,19 до –0,39 балла).

## Преимущества

При уровне эозинофилов в крови  $\geq 260$  кл. / мкл при применении омализумаба наблюдались более выраженное улучшение  $ОФВ_1$  и уменьшение частоты обострений, а также увеличение времени до 1-го обострения по сравнению с плацебо, в отличие от такового уровня < 260 кл. / мкл.

При показателе  $F_{ENO} \geq 19,5$  ppb при применении омализумаба по сравнению с плацебо наблюдалось улучшение оценки по AQLQ, снижение частоты обострений и увеличение времени до 1-го обострения, в отличие от такового < 19,5 ppb. У лиц с уровнем периостина < 50 нг / мл при применении омализумаба по сравнению с плацебо наблюдалось улучшение КЖ по AQLQ в отличие от такового  $\geq 50$  нг / мл. Однако уровень периостина не позволял прогнозировать динамику частоты обострений или функции легких. Также не получено доказательств, что периостин является подходящим биомаркером для выбора терапии у детей или подростков с БА. На уровень периостина оказывают влияние возраст, рост скелета и половое созревание [34].

## Нежелательные явления

Пациенты с высоким и низким уровнем  $F_{ENO}$ , числом эозинофилов в крови и уровнем периостина не различались по НЯ при применении омализумаба либо плацебо.

## Дополнительная информация

Оценка эффективности основана только на 1 исследовании (метаанализ 2 РКИ нельзя было провести), результаты которого не вполне убедительны из-за небольшого числа пациентов в подгруппах. Кроме того, риск систематической ошибки являлся высоким в связи с тем, что у значительной части пациентов исходная информация по биомаркерам отсутствовала.

## Выводы и дальнейшие направления исследований

Показатели эозинофилии крови и  $F_{ENO}$  могут использоваться для отбора пациентов с наибольшей вероятностью снижения частоты обострений и улучшения легочной функции на фоне терапии омализумабом. Показатели в подгруппах больных с низкими и высокими уровнями биомаркеров не различались по частоте и характеру побочных явлений. Это позволяет предположить, что у пациентов с высокими уровнями эозинофилии крови и  $F_{ENO}$  будет достигнут клинический эффект без увеличения риска НЯ, тогда как при низких уровнях биомаркеров отмечается риск НЯ при меньшей вероятности клинической эффективности.

По данным других исследований, исключенных из данного анализа, также сделаны важные выводы по использованию эозинофилов в крови для отбора пациентов с большей вероятностью клинического ответа на омализумаб. *T.B. Casale et al.* [35] представлены результаты объединенного анализа 2 РКИ.

Исследования *W. Busse et al.* [36] и *M. Soler et al.* [37] представляли собой двойные слепые РПКИ III фазы с участием в совокупности 1 071 пациента со средне-тяжелой или тяжелой БА, получавшие омализумаб либо плацебо. В 2018 г. опубликованы результаты объединенного анализа среднегодового числа обострений на фоне терапии омализумабом либо плацебо в подгруппах пациентов с высокой ( $\geq 300$  кл. / мкл) и низкой ( $< 300$  кл. / мкл) эозинофилией крови [35], при этом по результатам подтвердились рекомендации рабочей группы. При применении омализумаба число обострений снижалось в большей степени, чем при применении плацебо у лиц с высоким уровнем биомаркера – при эозинофилии  $\geq 300$  кл. / мкл этот показатель снизился на 67 %,  $< 300$  кл. / мкл – на 45 %.

В отличие от указанных исследований, в публикации [38] эффективность омализумаба не зависела от уровня биомаркера. По данным этого ретроспективного исследования с участием больных ( $n = 872$ ) тяжелой аллергической БА показано, что при назначении омализумаба частота обострений снижалась на 58,4 % (95%-ный ДИ – 52,7–63,4 %) при высоком уровне биомаркера (эозинофилия  $\geq 300$  кл. / мкл), и на 58,1 % (95%-ный ДИ – 52,7–63,4 %) – при низком уровне биомаркера (эозинофилия  $< 300$  кл. / мкл).

В планируемых к проведению РКИ следует изучить исходные уровни эозинофилии в крови и  $F_{ENO}$  вместе и по отдельности – для оценки их способности прогнозировать влияние терапии на различные конечные показатели, в т. ч. частоту обострений, функцию легких, AQLQ и контроль над БА. Кроме того, существует потребность в выделении маркеров, на основании которых можно принять клинические решения о продолжении или прекращении терапии моноклональными антителами к IgE у взрослых и детей с тяжелой БА.

### Мнения других экспертов

Согласно рекомендациям GINA (2019) [20], показатели эозинофилии крови  $\geq 260$  кл. / мкл и  $F_{ENO} \geq 20$  ppb являются предикторами хорошей эффективности лечения.

По данным рекомендаций Британского торакального общества и Шотландской межколлегийной сети по разработке клинических рекомендаций (*British Thoracic Society / Scottish Intercollegiate Guidelines Network – BTS / SIGN, 2019*) [39] и NICE по терапии БА [30], прогностические биомаркеры для оценки эффективности терапии антителами к IgE не рассматриваются.

### Рекомендации ERS / ATS

При назначении омализумаба взрослым и подросткам с тяжелой БА рекомендуется использование следующих пороговых значений:

- эозинофилия крови  $\geq 260$  кл. / мкл у подростков (старше 12 лет) и взрослых с тяжелой БА повышает вероятность клинической эффективности терапии антителами к IgE (слабая рекомендация, низкое качество доказательств);

- при  $F_{ENO} \geq 19,5$  ppb у подростков (старше 12 лет) и взрослых с тяжелой БА повышается вероятность клинической эффективности терапии антителами к IgE (слабая рекомендация, низкое качество доказательств).

### Примечания

Поскольку проспективная оценка этих рекомендаций не проводилась, при выборе терапии следует учитывать эти пороговые значения биомаркеров с осторожностью, так как у больных с более низкими показателями эозинофилии крови и  $F_{ENO}$  терапия омализумабом также может быть эффективной. Кроме того, эти пороговые значения выбраны по результатам единственного исследования [32]. Периостин был исключен из данных рекомендаций по причине недоступности в клинической практике и непригодности применения у детей моложе 12 лет, поскольку продуцируется растущей костной тканью.

В рекомендациях для отбора пациентов большее значение придается повышению эффективности терапии при использовании эозинофилов в крови и  $F_{ENO}$  и меньшее значение – использованию периостина.

**Вопрос 4. Следует ли применять ингаляционный М-холиноблокатор длительного действия у взрослых и детей с тяжелой БА?**

### Обзор доказательств

Обнаружены 3 РПКИ с участием взрослых пациентов в возрасте 18–75 лет (1 – перекрестное, 2 – с параллельными группами), 1 исследование с участием подростков (возраст – 12–17 лет) и 1 – с участием детей (возраст – 6–11 лет) [40–42]. В эти исследования включались пациенты с тяжелой БА, не контролируемой на ступенях 4–5 (GINA) или на 5-й ступени терапии – согласно NAEPF. Взрослые пациенты получали как минимум высокие дозы иГКС в комбинации с ДДБА, а дети и подростки – средние дозы иГКС и ДДБА + 3-й препарат базисной терапии.

Подростки и дети были рандомизированы в соотношении 1 : 1 : 1 для терапии тиотропия бромидом в дозе 5 мкг (2 дозы по 2,5 мкг) или 2,5 мкг (2 дозы по 1,25 мкг), или плацебо (2 дозы) на протяжении 12 нед. с использованием ингалятора *Respimat Soft Mist* в дополнение к предшествующей терапии, включающей иГКС + 1 или несколько препаратов базисной терапии. В 2 исследованиях с участием взрослых пациентов [41] сравнивались тиотропия бромид в дозе 5 мкг (2 дозы по 2,5 мкг) и плацебо, доставляемые через ингалятор *Respimat* в течение 48 нед. В рамках 3-стороннего перекрестного исследования с участием взрослых больных [40] проводилась 8-недельная терапия тиотропия бромидом в дозе 5 мкг (2 дозы по 2,5 мкг) либо тиотропия бромидом в дозе 10 мкг (2 дозы по 5 мкг), либо плацебо. Это исследование исключено из дальнейшего анализа и первичных метаанализов. Данные остальных 4 исследований с участием в совокупности 1 433 пациен-

тов (528 человек получали дозу 2,5 мкг) объединены для метаанализа.

В 4 исследованиях с параллельными группами с участием детей, подростков и взрослых при добавлении тиотропия бромид в дозе 5 мкг отмечено увеличение среднего пикового значения  $ОФВ_1$  по сравнению с плацебо (123 мл; 95%-ный ДИ – 88,2–158,7 мл), что было статистически достоверным, но клинически незначимым. Также отмечены серьезные погрешности в оценке убедительности данных по каждой возрастной группе. При добавлении к терапии тиотропия бромида в дозе 5 мкг также отмечено небольшое улучшение КЖ по ACQ-7 (–0,11 балла; 95%-ный ДИ – от –0,2 до –0,01 балла) и предотвращение ухудшения БА (частота обострений или интенсивность симптомов) (ОР – 0,79; 95%-ный ДИ – 0,70–0,89; абсолютный риск – 133); 95%-ный ДИ – 54–122), снижение числа случаев прогрессирования на 1 000 человек) по сравнению с плацебо, однако также выявлена серьезная погрешность в оценке убедительности данных для детей и подростков. У детей и подростков при добавлении тиотропия бромида в дозе 2,5 мкг не улучшался контроль над БА, но повышался  $ОФВ_1$  (%<sub>дож.</sub>) (средняя разница – 4,99; 95%-ный ДИ – 2,84–7,15) и снижалась частота ухудшения БА (ОР – 0,66; 95%-ный ДИ – 0,45–0,97). По результатам ретроспективного анализа скорректированных средних значений минимального соотношения  $ОФВ_1$  / форсированной жизненной емкости легких у детей также показано статистически значимое улучшение состояния во всех временных точках при применении тиотропия бромида в обеих дозах, за исключением 2,5 мкг на 8-й неделе по сравнению с плацебо.

По данным 2 исследований с участием взрослых показано, что применение тиотропия бромида в дозе 5 мкг не привело к значимым изменениям результатов по AQLQ (средняя разница – 0,10 балла; 95%-ный ДИ – от –0,04 до –0,23 балла), однако установлено увеличение периода до 1-го обострения, при котором потребовалось применение оГКС (ОР – 0,79 vs плацебо; 95%-ный ДИ – 0,62–1,01). Число обострений БА, при которых потребовалась госпитализация, в обеих группах было слишком мало (16 из 453 пациентов – в группе тиотропия бромида и 20 из 454 пациентов – в группе плацебо), чтобы делать какие-либо выводы [41]. В перекрестном исследовании с участием взрослых [40], которое было исключено из основного анализа, отмечено аналогичное благоприятное влияние тиотропия бромида в дозе 5 мкг (средняя разница – 139 мл; 95%-ный ДИ – 96–181 мл) и 10 мкг (средняя разница – 170 мл; 95%-ный ДИ – 128–213 мл) на максимальный показатель  $ОФВ_1$ .

Во всех 4 исследованиях частота НЯ в группах тиотропия бромида была ниже, чем в группах плацебо (ОР – 0,92; 95%-ный ДИ – 0,86–0,98). Тяжелые НЯ также встречались одинаково редко во всех группах.

### Преимущества

Применение длительно действующего М-холиноблокатора (ДДАХП) у детей, подростков и взрослых с тяжелой БА способствует улучшению  $ОФВ_1$  и кон-

троля над БА. У взрослых при назначении тиотропия бромида в дозе 5 мкг также улучшается контроль над БА и увеличивается время до 1-го обострения.

### Нежелательные явления

У детей, подростков и взрослых, получавших тиотропия бромид в дозе 5 мкг, НЯ наблюдались реже, чем в группах плацебо. Тяжелые НЯ также наблюдались редко и примерно с той же частотой, что и в группах плацебо.

### Выводы и направления дальнейших исследований

При добавлении к терапии тиотропия бромида улучшаются показатель  $ОФВ_1$  и контроль над симптомами у детей, подростков и взрослых с тяжелой БА, которая не контролируется комбинированной терапией на ступенях 4–5 (GINA) и ступени 5 (NAEPP). Частота тяжелых обострений, при которых потребовалось применение оГКС, была слишком низкой для каких-либо выводов. Исходя из отмеченных благоприятных эффектов тиотропия бромида, экспертами рабочей группы сделан вывод о том, что преимущества такой терапии перевешивают НЯ, а также обременительность и стоимость терапии тяжелой БА.

В группе разновозрастных пациентов при назначении тиотропия бромида отмечено эффективное предотвращение наступления суммарного исхода в виде ухудшения БА, включая контроль над симптомами и обострения. Однако у подростков и детей эффект такой терапии был недостоверным, вероятно, из-за меньшего размера выборки и меньшей продолжительности исследований. Также недостаточно доказательств благоприятного влияния тиотропия бромида на частоту тяжелых обострений у детей и подростков с тяжелой БА. Следует изучить этот вопрос в рамках более длительных исследований с большим размером выборки. В настоящее время доступны другие ДДАХП (умеклидиний и гликопирроний), которые можно использовать в качестве альтернативной длительной бронхолитической терапии тяжелой БА. Умеклидиний и гликопирроний оказывают благоприятное воздействие на функцию легких и контроль над симптомами у пациентов с легкой или среднетяжелой персистирующей БА [43–45], но их применение в качестве дополнительной терапии тяжелой БА не изучено.

В планируемых к проведению исследованиях следует выделить подгруппы пациентов с тяжелой БА, с большей вероятностью отвечающих на ДДАХП, которые могут получить пользу от пошагового добавления М-холиноблокаторов по сравнению с альтернативным пошаговым увеличением объема терапии, например, при добавлении ДДБА или повышении дозы иГКС. Имеющиеся данные о больших персистирующей легкой или среднетяжелой БА позволяют предположить, что эффективность ДДАХП более вероятна у пациентов с фиксированной или исходной обструкцией дыхательных путей [45, 46]. В 3 РКИ набирались только пациенты с  $ОФВ_1 < 80$  %<sub>дож.</sub> H.A. Kerstjens et al. [47] продемонстрированы положи-



тельные эффекты терапии у пациентов с  $ОФВ_1 < 60\%$ , или  $60–80\%$  долж. при скрининге. В 2 исследования набирались дети и подростки с  $ОФВ_1 60–90\%$  долж. [42, 48]. Таким образом, остается неясным, принесет ли добавление ДДАХП пользу пациентам, в частности взрослым, с тяжелой БА и более высокими показателями легочной функции, уже получающим комбинированную терапию высокими дозами иГКС и ДДБА.

При анализе эффективности лечения в когорте пациентов с тяжелой БА показаны сопоставимые положительные эффекты в подгруппах больных разного возраста, пола, этнической принадлежности и расы, с различными исходными показателями функции легких, индекса массы тела. Сложно сравнивать эффективность препарата у пациентов разных рас, поскольку в эти исследования набрано крайне малое число представителей афроамериканцев, латиноамериканцев и лиц азиатского происхождения [47]. Требуются новые исследования эффективности терапии ДДАХП у больных тяжелой БА в этих этнических группах, в которых наблюдается высокая заболеваемость БА. Также следует провести фармакогенетические исследования для оценки ответа на терапию в подгруппах с различными вариантами определенных генов. Также необходимы фармакогенетические исследования клинической эффективности в разных генетических подгруппах с использованием образцов ДНК из предыдущих и новых клинических исследований.

### Мнения других экспертов

В рекомендациях GINA (2019) [20] тиотропия бромид предлагается использовать в качестве дополнительного препарата на 4-й или 5-й ступени у пациентов с обострениями БА на фоне терапии иГКС и ДДБА. В рекомендациях NAEP [49] М-холиноблокаторы не рассматриваются.

### Рекомендации ERS / ATS

Рекомендуется добавление тиотропия бромида к базисной терапии у детей, подростков и взрослых с тяжелой БА, не контролируемой на 4–5-й ступенях терапии (GINA) или 5-й ступени терапии (NAEP) (сильная рекомендация, среднее качество доказательств).

### Примечания

Экспертам рабочей группы удалось найти доказательства эффективности тиотропия бромида у взрослых с тяжелой БА только при дозе 5 мкг. Однако влияние терапии на функцию легких сопоставимо с таковым для одобренных FDA доз 2,5 мкг и 5 мкг, эффективность которых оценивалась по данным плацебо-контролируемых исследований с параллельными группами с участием взрослых больных легкой или среднетяжелой БА. Кроме того, по данным клинических исследований с участием подростков со среднетяжелой и тяжелой БА показана сопоставимая эффективность доз 2,5 и 5 мкг. При составлении этой рекомендации большое значение придавалось улучшению контроля

над симптомами и снижению частоты обострений. Сила рекомендации основана на результатах сравнения комбинированной терапии с добавлением тиотропия бромида и без такового. Доказательства с умеренной убедительностью демонстрируют преимущества и стандартные риски побочных эффектов с балансом в пользу вмешательства. Эксперты рабочей группы посчитали тиотропия бромид приемлемым и доступным для использования. При составлении этой рекомендации также учитывалась возможность осуществления ингаляционной терапии по сравнению со стоимостью и бременем альтернативных дополнительных биологических препаратов для лечения тяжелой БА.

**Вопрос 5. Следует ли применять макролиды (а именно — азитромицин, кларитромицин) у взрослых и детей с тяжелой БА?**

### Обзор доказательств

В предыдущие рекомендации ERS / ATS была включена основанная на доступных на тот момент доказательствах слабая рекомендация, что длительная терапия макролидными АБП не должна применяться при лечении тяжелой БА у взрослых и детей [1]. С тех пор проведены 6 РКИ [50–55], в 5 из которых приняли участие только взрослые и в 1 — дети в возрасте от 6 до 18 лет. Определение БА с персистирующими симптомами или неконтролируемой БА в этих исследованиях различалось, и ни одно определение не соответствовало критериям тяжелой БА ERS / ATS. В 3 исследованиях использовался азитромицин, в 2 из них ( $n = 529$ ) применялись дозы 250–500 мг 3 раза в неделю на протяжении 26–48 нед. [50, 51]; в 3-м исследовании ( $n = 97$ ) использовалась дозировка 600 мг в сутки на протяжении 3 дней, затем — 600 мг в неделю на протяжении последующих 11 нед. [53]. В РКИ по изучению применения кларитромицина ( $n = 171$ ) использовалась дозировка 600 мг 2 раза в день на протяжении 8–16 нед. [54, 55]. Детям ( $n = 55$ ) азитромицин в дозе 250 мг назначался на ночь на протяжении 12 мес. при массе тела 25–40 кг и 500 мг — при массе тела  $> 40$  кг (исследование прекратилось досрочно через 30 нед. из-за отсутствия клинической эффективности) [52].

На протяжении 48 нед. наблюдения применение азитромицина сопровождалось снижением числа среднетяжелых и тяжелых обострений по сравнению с плацебо (1,07 эпизода vs 1,86 эпизода на 1 пациента в год; ОР — 0,59; 95%-ный ДИ — 0,47–0,74) [51]. Кроме того, терапия макролидами сопровождалась уменьшением числа пациентов, перенесших хотя бы 1 среднетяжелое или тяжелое обострение БА, и увеличением времени до 1-го обострения. Однако при указанной терапии не снижалась частота тяжелых обострений (25,3 % vs 34,6 %; ОР — 0,77; 95%-ный ДИ — 0,44–1,34) у детей и взрослых на протяжении 24–48 нед. наблюдения [50–52]. У взрослых терапия азитромицином и кларитромицином не сопровождалась изменением показателей ACQ-7 (средняя разли-



ца – 0,11 балла; 95%-ный ДИ – от –0,34 до –0,12 балла) или AQLQ (средняя разница – 0,16 балла; 95%-ный ДИ – от –0,06 до –0,37 балла), превышающих минимальную клинически значимую разницу.

И у взрослых, и у детей терапия азитромицином или кларитромицином не сопровождалась изменениями постбронходилатационного ОФВ<sub>1</sub> (%<sub>долж.</sub>) (средняя разница – 1,95; 95%-ный ДИ – от –2,42 до –6,32) или добронходилатационного ОФВ<sub>1</sub> (л) (средняя разница – 0,37; 95%-ный ДИ – от –2,17 до –2,91), которые превысили бы минимальную клинически значимую разницу относительно плацебо и между группами [50, 53, 54].

Влияние кларитромицина на воспаление дыхательных путей было неоднозначным. Только в одном из двух исследований получено значимое снижение числа нейтрофилов в дыхательных путях [55]. По сравнению с плацебо терапия макролидами у взрослых сопровождалась снижением числа инфекций нижних дыхательных путей, при которых требовалось назначение АБП (20,9 % vs 35,6 %; ОР – 0,60; 95%-ный ДИ – 0,45–0,79) [50, 51].

Число детей и взрослых с хотя бы 1 НЯ (67,3 % vs 72,2 %; ОР – 0,93; 95%-ный ДИ – 0,73–1,19) и число серьезных НЯ (9,1 % vs 11,4 %; ОР – 0,81; 95%-ный ДИ – 0,52–1,24) не различались с таковым при использовании плацебо [50, 51, 53, 54].

### Преимущества

При назначении макролидов снижается частота обострений БА. Данные по крайней мере 1 исследования позволяют предположить, что этот эффект не зависит от наличия или отсутствия у пациента эозинофилии [51]. Влияние препарата на контроль над БА и КЖ не достигло минимально клинически значимой разницы.

### Нежелательные явления

Показано, что длительная терапия макролидами сопровождается повышением частоты развития диареи. Однако число серьезных НЯ или число пациентов с хотя бы 1 побочным эффектом не отличались от таковых при применении плацебо. Хотя применение макролидов сопровождается риском удлинения интервала QT на ЭКГ или потери слуха, в исследованиях у пациентов с исходно нормальным слухом и исходно нормальным корректированным интервалом QT на ЭКГ частота этих явлений была не выше, чем в группе плацебо [51]. Частота выявления резистентного к макролидам стафилококка в носовой полости и ротоглотке увеличилась по сравнению с плацебо только в исследовании [50], а в [51] – не изменилась. У пациентов, получавших азитромицин на протяжении 48 нед., снизилась бактериальная нагрузка *Haemophilus influenzae* в дыхательных путях, но не изменилась общая бактериальная нагрузка или количество патогенных бактерий, хотя в этой группе чаще выявлялись в мокроте гены, отвечающие за резистентность к макролидам, эти пациенты реже принимали

АБП и переносили клинически диагностированные инфекции [51, 56].

### Выводы и направления дальнейших исследований

При длительной терапии макролидами снижается риск обострения БА по сравнению с плацебо. Однако отсутствуют убедительные доказательства того, что при такой терапии в какой-либо степени снижается частота тяжелых обострений или госпитализаций. Макролиды применяются только при неконтролируемой БА или БА с персистирующими симптомами, независимо от частоты обострений. Следовательно, неизвестно, позволит ли такая терапия улучшить исходы заболевания у пациентов, соответствующих критериям тяжелой БА согласно рекомендациям ERS / ATS. Развитие резистентности к АБП вследствие длительной антибактериальной терапии, например, макролидами – важный с точки зрения здравоохранения аспект. Следует тщательно взвесить потенциальную пользу такой терапии при тяжелой БА как для отдельного пациента, так и для сообщества в целом.

### Мнения других экспертов

Согласно рекомендациям GINA (2019) [20], следует назначать макролиды в низкой дозе в дополнение к базисной терапии пациентам с неэффективностью стандартной терапии, но такое применение классифицируется как несоответствующее инструкции, при этом предлагается соотносить потенциальную пользу с потенциальным риском развития резистентности к АБП.

BTS / SIGN (2016) [57] не рекомендуется применение макролидных АБП при БА. По данным пересмотренных рекомендаций BTS / SIGN (2019) [39], длительная макролидная терапия при тяжелой БА не упоминается.

FDA длительная терапия макролидами при БА не одобрена.

### Рекомендации ERS / ATS

Для снижения числа обострений у взрослых больных БА, получающих терапию 5-й степени (GINA / NAEPF), при персистирующих симптомах или неконтролируемом течении предлагается пробная терапия макролидами (слабая рекомендация, низкое качество доказательств).

Длительная терапия макролидами у детей и подростков с тяжелой неконтролируемой БА не рекомендуется (слабая рекомендация, низкое качество доказательств).

### Примечания

Эти рекомендации являются слабыми и основаны на необходимости предотвратить обострения и снизить использование оГКС. Польза и безопасность применения макролидов дольше 1 года при БА не установлены.

## Вопрос 6. Следует ли применять моноклональные антитела к IL-4Rα у взрослых и детей с тяжелой БА?

### Обзор доказательств

Дупилумаб — полностью человеческое моноклональное антитело к α-субъединице рецептора IL-4. Дупилумаб блокирует эффекты 2 основных цитокинов 2-го типа — IL-4 и IL-13. обнаружены 3 РПКИ, в которых оценивалось применение дупилумаба в качестве дополнения к базисной терапии у пациентов со среднетяжелой или тяжелой БА [58–60]. В 2 РКИ приняли участие подростки в возрасте 12–17 лет и взрослые (не моложе 18 лет) [59, 60], а в 3-м исследовании участвовали только взрослые [58].

В рамках клинического исследования IIb фазы по подбору доз [58] изучались 4 режима дозирования дупилумаба — 200 или 300 мг подкожно каждые 2 или 4 нед. на протяжении 24 нед. Взрослые пациенты ( $n = 769$ ) с неконтролируемой, несмотря на средние или высокие дозы иГКС и ДДБА, БА, рандомизированы в соотношении 1 : 1 : 1 : 1 в 4 группы лечения или плацебо. Основным конечным показателем явилось изменение  $ОФВ_1$  (л) через 12 нед. у пациентов с эозинофилией крови  $\geq 300$  кл. / мкл. В предварительно определенные дополнительные конечные показатели через 12 и 24 нед. включены число обострений БА, время до развития тяжелого обострения, оценка симптомов БА, КЖ при БА и динамика  $ОФВ_1$  (%<sub>долж.</sub>).

По данным РКИ [59] эффективности и безопасности III фазы изучалось применение дупилумаба у подростков и взрослых со среднетяжелой или тяжелой неконтролируемой БА в дополнение к базисной терапии в дозе 200 мг (после нагрузочной дозы 400 мг) или 300 мг (после нагрузочной дозы 600 мг) каждые 2 нед. на протяжении 52 нед. Всего в группы лечения или применения плацебо соответствующего объема рандомизированы 1 902 пациента в соотношении 2 : 2 : 1 : 1. Основными конечными показателями являлись частота обострений за год (через 52 нед.) и абсолютное изменение  $ОФВ_1$  (через 12 нед.). Дополнительные конечные показатели включали динамику  $ОФВ_1$  (%<sub>долж.</sub>), показатели ACQ и AQLQ, а также анализ подгрупп в зависимости от эозинофилии крови.

В РКИ III фазы [60] изучалось применение дупилумаба (300 мг каждые 2 нед. в течение 24 нед.) у подростков ( $n = 210$ ) и взрослых с тяжелой гормонозависимой БА. После периода оптимизации дозы ГКС пациенты рандомизированы в соотношении 1 : 1 для терапии дупилумабом или плацебо. С 4-й по 20-й неделю доза оГКС снижалась. Основным конечным показателем являлось снижение дозы оГКС (%), необходимой для поддержания контроля над БА. Дополнительные конечные показатели включали доли пациентов, у которых дозы оГКС были снижены как минимум на 50 % и < 5 мг в сутки.

Данные этих 3 исследований объединены в метаанализе (см. раздел «Доказательства» в дополнительных материалах). Оценивались влияние дупилумаба на частоту обострений, контроль над БА, КЖ при БА,

легочная функция и побочные эффекты при дозах 200 и 300 мг через 24 и 52 нед. соответственно. Также оценивалась разница в эффектах в зависимости от уровня эозинофилии крови.

У пациентов, которые получали дупилумаб (200 мг или 300 мг каждые 2 нед. в течение 24 и 52 нед.), наблюдалось существенное (46–70,5 %) снижение среднегодовой частоты обострений БА по сравнению с получавшими плацебо. В группе дупилумаба насчитывалось больше пациентов с гормонозависимой тяжелой БА, у которых удалось снизить дозу оГКС на > 50 % (ОР — 1,49; 95%-ный ДИ — 1,22–1,83; абсолютный риск — 26; 95%-ный ДИ — 12–44; на 100 пациентов, снизивших дозу оГКС на 50 %, больше), у которых удалось снизить дозу оГКС до < 5 мг в сутки (ОР — 1,92; 95%-ный ДИ — 1,46–2,53; абсолютный риск — 344; 95%-ный ДИ — 172–572; на 1 000 больше пациентов) и отменить поддерживающую терапию оГКС (ОР — 1,81; 95%-ный ДИ — 1,28–2,57). Улучшения показателей  $ОФВ_1$ , ACQ-5 и AQLQ были статистически значимыми, но не достигли минимально клинически значимой разницы.

Выраженность эффекта по всем конечным показателям у пациентов с эозинофилией крови  $\geq 300$  кл. / мкл была выше таковой при эозинофилии < 300 кл. / мкл (см. раздел «Доказательства» в дополнительных материалах). В исследовании [59] пациенты были стратифицированы в когорты по уровню эозинофилии крови — < 150, 150–300 и  $\geq 300$  кл. / мкл. ОШ для среднегодовой частоты тяжелых обострений за 52 нед. по объединенным данным для дозировок 200 и 300 мг каждые 2 нед. составило 0,33 (95%-ный ДИ — 0,26–0,42; 0,386 эпизода vs 1,158 эпизода на 1 пациента в год) — для подгрупп больных с уровнем эозинофилии крови  $\geq 300$  кл. / мкл, 0,60 (96%-ный ДИ — 0,43–0,83; 0,515 эпизода vs 0,855 эпизода на 1 пациента в год) — для подгрупп больных с уровнем эозинофилии крови 150–300 кл. / мкл и 1,04 (95%-ный ДИ — 0,76–1,43; 0,604 эпизода vs 0,576 эпизода на 1 пациента в год) — для подгрупп больных с уровнем эозинофилии крови < 150 кл. / мкл. В том же исследовании получены сходные результаты по частоте обострений и функции легких при стратификации по  $F_{ENO}$  ( $\geq 50$ , от  $\geq 25$  до < 50 и < 25 ppb). По данным ретроспективного анализа влияния биомаркеров выявлена максимальная клиническая эффективность у пациентов с  $F_{ENO} \geq 25$  ppb и уровнем эозинофилии крови  $\geq 150$  кл. / мкл.

### Преимущества

При назначении дупилумаба в качестве дополнения к базисной терапии больных БА, у которых не удается достичь контроля с помощью высокой дозы иГКС и ДДБА, возможно снижение частоты обострений, уменьшение симптомов и улучшение функции легких. Эффективность препарата выше у пациентов с биомаркерами 2-го типа (уровень эозинофилии крови  $\geq 150$  кл. / мкл или  $F_{ENO} > 25$  ppb). Дупилумаб может способствовать снижению дозы оГКС у пациентов с тяжелой ГКС-зависимой БА.

### Нежелательные явления

Риск НЯ при терапии дупилумабом, по-видимому, невелик, и наиболее частый побочный эффект, связанный с препаратом, — реакция в месте инъекции. Частота серьезных и любых других побочных эффектов в группах дупилумаба и плацебо была сопоставимой. Однако механизмы и потенциальная клиническая значимость преходящей эозинофилии крови на фоне лечения понятны не до конца, требуются дальнейшие исследования. Поскольку вызванная дупилумабом эозинофилия не сопровождалась побочными эффектами, специальные рекомендации по ее мониторингу отсутствуют.

### Выводы и направления дальнейших исследований

При назначении дупилумаба в дополнение к основной терапии существенно снижается частота обострений неконтролируемой среднетяжелой или тяжелой БА [58–60], при его применении отмечено эффективное снижение дозы оГКС у пациентов с тяжелой ГКС-зависимой БА. Терапия дупилумабом также сопровождается улучшением функции легких, контроля над БА и КЖ. Наиболее выраженное улучшение получено у пациентов с более высокой эозинофилией.

Ожидается, что в текущих и будущих исследованиях будет получена дополнительная информация по долгосрочной безопасности и продолжительности эффектов дупилумаба. Также требуются дополнительные данные по эффективности и безопасности препарата у детей и подростков. В дальнейших исследованиях также следует уделить внимание выявлению характеристик заболевания и популяции больных, которые позволяют прогнозировать эффективность такой терапии.

### Мнения других экспертов

По рекомендации GINA (2019) [20], дупилумаб следует применять в качестве дополнения к базисной терапии у пациентов с неконтролируемой БА с тяжелым эозинофильным воспалением или воспалением 2-го типа на фоне высокой дозы иГКС и ДДБА или с поддерживающей терапией оГКС.

В рекомендациях NICE [30] в настоящее время дупилумаб не включен в список дополнительных средств для лечения БА.

### Рекомендация ERS / ATS

Предлагается использовать дупилумаб в качестве дополнения к базисной терапии у взрослых пациентов с тяжелой эозинофильной БА или тяжелой ГКС-зависимой БА, независимо от уровня эозинофилов в крови (слабая рекомендация).

### Примечания

При составлении рекомендации большое значение придавалось снижению частоты обострений и дозы

ГКС и меньшее значение — стоимости или обременительности вмешательства.

Врачу следует соотнести высокую стоимость дупилумаба и его влияние на экономическую эффективность, доступность и осуществимость терапии с предполагаемым улучшением исходов БА [24]. Поскольку объем данных о применении антител к IL-4 и IL-13 у подростков ограничен, эксперты рабочей группы не смогли сформулировать рекомендацию для этой возрастной группы. Нет данных о применении этих препаратов у детей моложе 12 лет.

### Обсуждение

Экспертами рабочей группы по тяжелой БА (согласно критериям ERS / ATS) рассмотрены 6 вопросов, не охваченных предыдущими клиническими рекомендациями. Проведен систематический поиск литературы и анализ GRADE для составления рекомендаций по каждому вопросу по модели PICO относительно терапии тяжелой БА. При составлении каждой рекомендации соотносились такие факторы, как польза и обременительность лечения, побочные эффекты и стоимость, качество имеющихся доказательств, а также доступность и приемлемость вмешательства (табл. 2). Сформулирована слабая рекомендация по применению терапии антителами к IL-5 и IL-4, -13 при тяжелой неконтролируемой БА с эозинофильным фенотипом. Антитела к IL-4, -13 также показаны пациентам с тяжелой гормонозависимой БА при любом уровне эозинофилии. Для выявления пациентов, у которых терапия антителами к IL-5 и IgE с наибольшей вероятностью будет эффективной, предложены пороговые значения числа эозинофилов и  $F_{ENO}$ . Подросткам и взрослым с тяжелой БА, неконтролируемой терапией 4–5-й ступеней (GINA) и 5-й ступени (NAEPP), рекомендовано применение ингаляционного тиотропия бромида. Пробная длительная терапия макролидами предлагается для снижения частоты обострений у пациентов с БА с персистирующими симптомами или БА, неконтролируемой терапией 5-й ступени (GINA) или (NAEPP) (слабая рекомендация). При появлении новых доказательств эти рекомендации следует пересмотреть.

Долгое время считалось, что при традиционных требованиях к качественным контролируемым РКИ не отражаются данные реальной клинической практики [61–63]. При таких исследованиях накладываются строгие ограничения по установлению диагноза, например, во избежание ошибочного диагноза хроническая обструктивная болезнь легких (ХОБЛ) часто исключаются курящие взрослые больные БА. Однако это нелогично. ХОБЛ может развиваться также у некурящих пациентов, а курящие больные БА могут быть резистентны к ГКС и поэтому с меньшей вероятностью у них может отмечаться улучшение при приеме биологических препаратов. Частым требованием является острый тест с бронхолитическим препаратом, хотя это не позволяет прогнозировать ответ на лечение и для него отсутствует единое определение.



Таблица 2

*Рекомендации по терапии тяжелой бронхиальной астмы совместной рабочей группы по тяжелой бронхиальной астме Европейского респираторного и Американского торакального обществ*

Table 2

*European Respiratory Society / American Thoracic Society Severe Asthma Task Force recommendations for the management of severe asthma*

| Вопрос | Рекомендация                                                                                                                                                                                                                                        | Сила рекомендации | Качество доказательств |
|--------|-----------------------------------------------------------------------------------------------------------------------------------------------------------------------------------------------------------------------------------------------------|-------------------|------------------------|
| 1      | Предлагается использовать терапию антителами к IL-5 в качестве дополнения к базисной терапии у взрослых больных тяжелой неконтролируемой БА с эозинофильным фенотипом, а также больных тяжелой ГКС-зависимой БА                                     | Слабая            | Низкое                 |
| 2      | Предлагается пороговое значение числа эозинофилов в крови $\geq 150$ кл. / мкл можно использовать как критерий начала терапии антителами к IL-5 у взрослых пациентов с тяжелой БА и обострениями БА в анамнезе                                      | Слабая            | Низкое                 |
| 3      | Предлагается использовать пороговое значение числа эозинофилов в крови $\geq 260$ кл. / мкл для выявления подростков (старше 12 лет) и взрослых с тяжелой БА, которые с большей вероятностью получат клинический эффект от терапии антителами к IgE | Слабая            | Низкое                 |
|        | Предлагается использовать пороговое значение $F_{\text{ENO}} \geq 19,5$ ppb для выявления подростков (старше 12 лет) и взрослых с тяжелой БА, которые с большей вероятностью получат пользу от терапии антителами к IgE                             | Слабая            | Низкое                 |
| 4      | Рекомендуется добавление тиотропия бромида к базисной терапии у детей, подростков и взрослых с тяжелой БА, не контролируемой терапией 4–5-й ступеней GINA или 5-й ступени NAEPP                                                                     | Сильная           | Среднее                |
| 5      | Предлагается пробная длительная терапия макролидами с целью снижения числа обострений у взрослых больных БА с персистирующими симптомами или БА, не контролируемой терапией 5-й ступени GINA / NAEPP                                                | Слабая            | Низкое                 |
|        | Не рекомендуется длительная терапия макролидами у детей и подростков с тяжелой неконтролируемой БА                                                                                                                                                  | Слабая            | Низкое                 |
| 6      | Предлагается использовать дупилумаб в качестве дополнения к базисной терапии у взрослых пациентов с тяжелой эозинофильной БА или тяжелой ГКС-зависимой БА, независимо от уровня эозинофилов в крови                                                 | Слабая            | Низкое                 |

Примечание: БА – бронхиальная астма; IL – интерлейкин,  $F_{\text{ENO}}$  – фракция оксида азота в выдыхаемом воздухе; GINA (*Global Initiative for Asthma*) – Глобальная инициатива по бронхиальной астме; NAEPP (*National Asthma Education and Prevention Program*) – Национальная программа по повышению осведомленности и предотвращению бронхиальной астмы.

Возможны 2 причины исключения пациента с тяжелой БА из исследования, например, прием моноклональных антител против воспаления 2-го типа [61, 63]. Первая, полностью логичная причина – отсутствие каких-либо доказательств активности 2-го типа. Вторая, намного более неоднозначная, – наличие активации 2-го типа, но с одновременным присутствием критерия исключения, такого как курение или отсутствие вариабельной бронхиальной обструкции. Специалистами Уэссекской группы недавно проведен анализ 37 РКИ биологических препаратов, оказывающих влияние на воспаление 2-го типа; показано, что в основные исследования биологических препаратов III фазы включены < 10 % Уэссекской когорты больных тяжелой БА. Наиболее частыми причинами исключения таких пациентов являлись отсутствие фиксированной и (или) вариабельной бронхиальной обструкции [61], а частота исключения пациентов с эозинофильной БА была еще выше. В сопроводительной редакционной статье [64] отмечено, что правильным подходом к проведению будущих исследований, например, препаратов против воспаления 2-го типа, являлось включение всех пациентов с поддающейся лечению эозинофилией дыхательных путей, независимо от других характеристик БА. Это совпадает с подходом комиссии *The Lancet* [63] и данными об эффективности препаратов, подавляющих воспаление 2-го типа, при эозинофильной ХОБЛ [65, 66]. К счастью, лицензирующие органы ориентируются на поддающуюся лечению эозинофилию дыхательных путей, поскольку в противном случае многие пациенты, у которых такая терапия могла бы быть эффективной, не получают доступа к этим пре-

паратам. Это важно и в рамках постмаркетингового наблюдения, которое должно быть обязательным для дорогостоящих препаратов для подтверждения того, что такие характеристики, как курение и фиксированная бронхиальная обструкция, не оказывают влияния на эффективность терапии.

Еще один важный вопрос – следует ли набирать в исследования биологических препаратов только пациентов с истинно тяжелой и резистентной к другой терапии БА. Изначально экспертами рабочей группы ERS / *ATS Task Force*, как и многими другими, степень тяжести БА определялась по объему назначенной терапии, а также по неблагоприятным исходам, таким как БА, хронические симптомы и риски [1]. При таком определении подразумевается, что пациент надлежащим образом соблюдает указания врача. Однако становится ясно, что риск обострений БА и смерти существует также у пациентов, которым назначены гораздо более низкие дозы препаратов. По данным национального обзора связанных с БА смертей в Великобритании (*UK National Review of Asthma Deaths*) [67, 68] показано, что около 60 % умерших пациентов не соответствовали критериям тяжелой БА ERS / *ATS*. Помимо положительного прогностического эффекта предшествующих обострений, важными факторами являлись недостаточное использование и ГКС, чрезмерное использование  $\beta_2$ -агонистов короткого действия и отсутствие регулярных мониторинговых посещений врача. На базе клиник, специализирующихся на тяжелой БА, контроль над БА у таких больных можно улучшить путем устранения таких факторов, как несоблюдение указаний врача. Однако пациенты с т. н. рефрактерной БА, трудно поддающейся лече-



нию, по-прежнему не выполняют указаний врача, у них сохраняются другие факторы риска неконтролируемого течения БА, несмотря на большой объем терапии. Другими словами, их приверженность лечению была улучшена насколько возможно, но она все еще недостаточна. Таким детям (или другим не соблюдающим назначения пациентам) следует предлагать биологические препараты, если их заболевание поддается лечению, во избежание летального исхода [69, 70]. Тот же аргумент можно использовать и по отношению к взрослым. Пациенты указанной категории не включаются в РКИ, поэтому отсутствует возможность составить доказательные рекомендации. Однако представляется нелогичным, что персистирующее, поддающееся лечению заболевание, резистентное к ГКС или неконтролируемое из-за социальных факторов, следует лечить одинаково, независимо от причины. Обязательным условием назначения биологических препаратов пациентам, не выполняющим назначения, должно быть проведение терапии в стационаре. Таким пациентам нельзя назначать это лечение на дому.

Сложности могут возникнуть с обеспечением доступа к биологическим препаратам детям, у которых они могут быть эффективными. Фенотипы БА у взрослых и детей очевидно различаются [71]. У детей с тяжелой БА очень часто встречается атопия, но это никоим образом не означает, что эозинофилия дыхательных путей обязательно обусловлена воспалением 2-го типа [72]. Эозинофильные эндотипы не 2-го типа обнаруживаются даже у взрослых [73]. Также есть причины полагать, что антиэозинофильная терапия может быть опасна для детей из-за той роли, которую эозинофилы играют в поддержании иммунного гомеостаза [74]. Имеются обширные данные по эффективности и безопасности применения у детей моноклонального антитела к IgE омализумаба [75–77], поэтому в отсутствие надежного биомаркера эффективности следует повторить эти исследования с антителами к IL-5. Итак, крайне важно провести исследования применения этих новых препаратов у детей для оценки их влияния на развитие организма и отдаленные исходы лечения, а также продолжить поиск биомаркеров эффективности [78].

Применение биологических препаратов у детей вызывает беспокойство еще с одной точки зрения. Традиционно сначала проводятся исследования с участием взрослых больных, а затем, в случае подтверждения эффективности и безопасности, переходят к исследованиям с участием детей. Если препарат у взрослых неэффективен, дальнейшие исследования не проводятся. Очевидный пример – моноклональное антитело к IL-13 тралокинумаб [79, 80]. Клиническая эффективность этого препарата не показана по данным как минимум 3 РКИ с участием взрослых [81–83], а исследования с участием детей не планируются на том основании, что по имеющимся данным, IL-13 не играет существенной роли для эозинофилии дыхательных путей. В такие исследования включают подростков старше 12 лет, но в ограниченном количестве – из-за большого числа взрослых пациентов. Хотя выводы исследований относительно взрослых логичны, нет данных, которые позволили бы подтвер-

дить или опровергнуть их в отношении детей. Возможно ли, что по результатам исследований у взрослых ошибочно отвергается потенциально ценное для детей моноклональное антитело? В настоящее время будет очень сложно инициировать исследование тралокинумаба у детей, но это доказывает необходимость более глубокого изучения сходств и различий эндотипов БА у детей и взрослых.

В данном документе представлен обзор большого числа высококачественных доказательств и новые доказательства возможности существенного снижения дозы пероральных ГКС и риска обострений БА, однако впереди еще много работы. Меполизумаб, бенрализумаб и реслизумаб воздействуют на воспаление 2-го типа, с большой вероятностью будут зарегистрированы новые, аналогичные вещества. Возникает вопрос: как определить, какой из биологических препаратов с похожим механизмом действия назначить конкретному пациенту? Хотя в большинстве рассмотренных исследований в качестве основного маркера воспаления 2-го типа использовалась эозинофилия периферической крови, для идентификации субэндотипа могут быть информативны и другие биомаркеры, такие как  $F_{ENO}$ . Предполагается, что нужны дополнительные биомаркеры воспаления 2-го типа, бесценный вклад при этом принесет систематический анализ существующих когорт больных тяжелой БА, таких как SARP (*Severe Asthma Research Program*) и U-BIOPRED (*Unbiased BIOMarkers in PREDiction of respiratory disease outcomes*). Хотя согласно групповым данным показаны небольшие отличия биомаркеров друг от друга, невозможно представить, что всем пациентам будет подходить один биомаркер. Конечно, можно провести серию исследований типа «n-of-1» (клиническое исследование, в котором 1 пациент проходит в рандомизированном порядке экспериментальное лечение, затем – стандартное или плацебо. – Прим. пер.), однако подобный подход не является научным. Кроме того, комбинация биологических препаратов может оказаться лучше из-за того, что наиболее эффективным подходом к подавлению воспаления 2-го типа окажется блокирование всех типичных для цитокинов 2-го типа – IL-4, IL-5 и IL-13 – с помощью дупилумаба в сочетании с антителами к IL-5 или IL-5R $\alpha$ . Ответы на эти вопросы могут дать исследования в условиях реальной клинической практики [84].

Еще одна задача на будущее – определить роль биологических препаратов в странах с низким и средним уровнем дохода, поскольку большинство данных получены в развитых странах. В разных странах мира могут быть распространены различные эндотипы БА и значимость эозинофилии крови в регионах с высокой частотой паразитарных инфекций может отличаться. Всемирной организацией здравоохранения выделены 3 разновидности тяжелой БА, к странам с низким и средним уровнем дохода наиболее применима такая разновидность, как нелеченная тяжелая БА [85]. Первоочередной задачей должно быть обеспечение одинаковой доступности базисных препаратов для лечения БА во всем мире. Это позволит собрать данные об истинной распространенности

тяжелой резистентной БА и рефрактерной, трудно поддающейся лечению БА в странах с низким и средним уровнем дохода. Серьезным препятствием будет стоимость базисных препаратов и обеспечение доступа к ним пациентов в небогатых странах. Конечно, эта сложность возникает не только при лечении БА.

Наконец, большинство исследований новых препаратов для лечения БА были посвящены предотвращению обострений, при этом применение препаратов было очень успешным. Их использование может сократить и неблагоприятные последствия обострений БА. В случае, когда пациент вовремя получает неотложную помощь, базисная терапия обострения БА проста, намного сложнее предотвратить дальнейшие обострения. Подчеркивается, что наиболее высокий риск наблюдается в течение 1 мес. после перенесенного обострения [67, 68]. Если учесть, что у всех больных, кроме детей дошкольного возраста, обострения БА вызваны респираторной вирусной инфекцией на фоне неконтролируемого воспаления дыхательных путей 2-го типа, перспективной стратегией снижения числа рецидивов может являться однократная инъекция препарата, подавляющего воспаление 2-го типа, особенно потому, что при этом от пациента не требуется соблюдения указаний врача, что поможет выиграть время для устранения социальных и внешнесредовых факторов. Однако для рекомендации такой стратегии нужны дополнительные данные.

Итак, рассмотренные здесь вопросы по модели PICO позволили экспертам рабочей группы ERS / ATS составить рекомендации по лечению тяжелой БА, которые приведут к изменению клинических рекомендаций и улучшению важных для пациента исходов, а именно – к снижению дозы оГКС, частоты обострений и улучшению КЖ. Однако эти рекомендации не будут эффективными у всех больных тяжелой БА, требуются более узкие исследования для разных фенотипов. Следует также напомнить, что перед применением этих новых и зачастую инвазивных и дорогостоящих подходов к лечению следует приложить все усилия к получению максимальной эффективности от стандартной терапии. При этом открывается захватывающий новый и развивающийся мир инновационных эффективных подходов для меньшинства больных БА, которые по каким-либо причинам не отвечают на стандартную терапию и продолжают страдать от частых обострений.

## Литература / References

- Chung K.F., Wenzel S.E., Brozek J.L. et al. International ERS/ATS guidelines on definition, evaluation and treatment of severe asthma. *Eur. Respir. J.* 2014; 43 (2): 343–373. DOI: 10.1183/09031936.00202013.
- Guyatt G.H., Oxman A.D., Vist G.E. et al. GRADE: an emerging consensus on rating quality of evidence and strength of recommendations. *BMJ.* 2008; 336: 924–926. DOI: 10.1136/bmj.39489.470347.AD.
- Wedzicha J., Miravittles M., Hurst J.R. et al. Management of COPD exacerbations: a European Respiratory Society/American Thoracic Society guideline. *Eur. Respir. J.* 2017; 49 (3): 1600791. DOI: 10.1183/13993003.00791-2016.
- Wedzicha J.A., Calverley P.M.A., Albert R.K. et al. Prevention of COPD exacerbations: a European Respiratory Society/American Thoracic Society guideline. *Eur. Respir. J.* 2017; 50 (3): 1602265. DOI: 10.1183/13993003.02265-2016.
- Santanello N.C., Zhang J., Seidenberg B. et al. What are minimal important changes for asthma measures in a clinical trial? *Eur. Respir. J.* 1999; 14 (1): 23–27. DOI: 10.1034/j.1399-3003.1999.14a06.x.
- Juniper E.F., Svensson K., Mork A.C. et al. Measurement properties and interpretation of three shortened versions of the asthma control questionnaire. *Respir. Med.* 2005; 99 (5): 553–558. DOI: 10.1016/j.rmed.2004.10.008.
- Juniper E.F., Guyatt G.H., Willan A., Griffith L.E. Determining a minimal important change in a disease-specific quality of life questionnaire. *J. Clin. Epidemiol.* 1994; 47 (1): 81–87. DOI: 10.1016/0895-4356(94)90036-1.
- Bel E.H., Wenzel S.E., Thompson P.J. et al. Oral glucocorticoid-sparing effect of mepolizumab in eosinophilic asthma. *N. Engl. J. Med.* 2014; 371 (13): 1189–1197. DOI: 10.1056/NEJMoA1403291.
- Ortega H.G., Liu M.C., Pavord I.D. et al. Mepolizumab treatment in patients with severe eosinophilic asthma. *N. Engl. J. Med.* 2014; 371 (13): 1198–1207. DOI: 10.1056/NEJMoA1403290.
- Chupp G.L., Bradford E.S., Albers F.C. et al. Efficacy of mepolizumab add-on therapy on health-related quality of life and markers of asthma control in severe eosinophilic asthma (MUSCA): a randomised, double-blind, placebo-controlled, parallel-group, multicentre, phase 3b trial. *Lancet Respir. Med.* 2017; 5 (5): 390–400. DOI: 10.1016/S2213-2600(17)30125-X.
- Bjerner L., Lemiere C., Maspero J. et al. Reslizumab for inadequately controlled asthma with elevated blood eosinophil levels: a randomized phase 3 study. *Chest.* 2016; 150 (4): 789–798. DOI: 10.1016/j.chest.2016.03.032.
- Castro M., Mathur S., Hargreave F. et al. Reslizumab for poorly controlled, eosinophilic asthma: a randomized, placebo-controlled study. *Am. J. Respir. Crit. Care Med.* 2011; 184 (10): 1125–1132. DOI: 10.1164/rccm.201103-0396OC.
- Castro M., Zangrilli J., Wechsler M.E. et al. Reslizumab for inadequately controlled asthma with elevated blood eosinophil counts: results from two multicentre, parallel, double-blind, randomised, placebo-controlled, phase 3 trials. *Lancet Respir. Med.* 2015; 3 (5): 355–366. DOI: 10.1016/S2213-2600(15)00042-9.
- Corren J., Weinstein S., Janka L. et al. Phase 3 study of reslizumab in patients with poorly controlled asthma: effects across a broad range of eosinophil counts. *Chest.* 2016; 150 (4): 799–810. DOI: 10.1016/j.chest.2016.03.018.
- Bleecker E.R., FitzGerald J.M., Chanez P. et al. Efficacy and safety of benralizumab for patients with severe asthma uncontrolled with high-dosage inhaled corticosteroids and long-acting  $\beta_2$ -agonists (SIROCCO): a randomised, multicentre, placebo-controlled phase 3 trial. *Lancet.* 2016; 388 (10056): 2115–2127. DOI: 10.1016/S0140-6736(16)31324-1.
- Castro M., Wenzel S.E., Bleecker E.R. et al. Benralizumab, an anti-interleukin 5 receptor  $\alpha$  monoclonal antibody, versus placebo for uncontrolled eosinophilic asthma: a phase 2b randomised dose-ranging study. *Lancet Respir. Med.* 2014; 2 (11): 879–890. DOI: 10.1016/S2213-2600(14)70201-2.
- FitzGerald J.M., Bleecker E.R., Nair P. et al. Benralizumab, an anti-interleukin-5 receptor  $\alpha$  monoclonal antibody, as add-on treatment for patients with severe, uncontrolled, eosinophilic asthma (CALIMA): a randomised, double-blind, placebo-controlled phase 3 trial. *Lancet.* 2016; 388 (10056): 2128–2141. DOI: 10.1016/S0140-6736(16)31322-8.
- Nair P., Wenzel S., Rabe K.F. et al. Oral glucocorticoid-sparing effect of benralizumab in severe asthma. *N. Engl. J. Med.* 2017; 376 (25): 2448–2458. DOI: 10.1056/NEJMoA1703501.
- Park H.S., Kim M.K., Imai N. et al. A phase 2a study of benralizumab for patients with eosinophilic asthma in South Korea and Japan. *Int. Arch. Allergy Immunol.* 2016; 169: 135–145. DOI: 10.1159/000444799.
- Global Initiative for Asthma. Global Strategy for Asthma Management and Prevention. 2019. Available at: <http://ginasthma.org/2019-gina-report-global-strategy-for-asthma-management-and-prevention> [Accessed: October 28, 2019].
- National Institute for Health and Care Excellence. Mepolizumab for treating severe refractory eosinophilic asthma. TA431. 2017. Available at: [www.nice.org.uk/guidance/ta431](http://www.nice.org.uk/guidance/ta431) [Accessed: October 1, 2019].



22. National Institute for Health and Care Excellence. Reslizumab for treating severe eosinophilic asthma. TA479. 2017. Available at: [www.nice.org.uk/guidance/ta479](http://www.nice.org.uk/guidance/ta479) [Accessed: October 01, 2019].
23. National Institute for Health and Care Excellence. Benralizumab for treating severe eosinophilic asthma. TA565. 2019. Available at: [www.nice.org.uk/guidance/ta565](http://www.nice.org.uk/guidance/ta565) [Accessed: October 01, 2019].
24. Institute for Clinical and Economic Review. Biologic therapies for treatment of asthma associated with type 2 inflammation: effectiveness, value, and value-based price benchmarks. 2018. Available at: [https://icer-review.org/wp-content/uploads/2018/04/ICER\\_Asthma\\_Draft\\_Report\\_092418v1.pdf](https://icer-review.org/wp-content/uploads/2018/04/ICER_Asthma_Draft_Report_092418v1.pdf) [Accessed: October 01, 2019].
25. Nair P., Pizzichini M.M., Kjarsgaard M. et al. Mepolizumab for prednisone-dependent asthma with sputum eosinophilia. *N. Engl. J. Med.* 2009; 360 (10): 985–993. DOI: 10.1056/NEJMoa0805435.
26. Ortega H.G., Yancey S.W., Mayer B. et al. Severe eosinophilic asthma treated with mepolizumab stratified by baseline eosinophil thresholds: a secondary analysis of the DREAM and MENSA studies. *Lancet Respir. Med.* 2016; 4 (7): 549–556. DOI: 10.1016/S2213-2600(16)30031-5.
27. Mukherjee M., Aleman Paramo F., Kjarsgaard M. et al. Weight-adjusted intravenous reslizumab in severe asthma with inadequate response to fixed-dose subcutaneous mepolizumab. *Am. J. Respir. Crit. Care Med.* 2018; 197 (1): 38–46. DOI: 10.1164/rccm.201707-1323OC.
28. Khatri S., Moore W., Gibson P.G. et al. Assessment of the long-term safety of mepolizumab and durability of clinical response in patients with severe eosinophilic asthma. *J. Allergy Clin. Immunol.* 2019; 143 (5): 1742–1751. DOI: 10.1016/j.jaci.2018.09.033.
29. Busse W.W., Bleeker E.R., FitzGerald J.M. et al. Long-term safety and efficacy of benralizumab in patients with severe, uncontrolled asthma: 1-year results from the BORA phase 3 extension trial. *Lancet Respir. Med.* 2019; 7 (1): 46–59. DOI: 10.1016/S2213-2600(18)30406-5.
30. National Institute for Health and Care Excellence. Asthma: diagnosis, monitoring and chronic asthma management. 2017. Available at: [www.nice.org.uk/guidance/ng80](http://www.nice.org.uk/guidance/ng80) [Accessed: October 28, 2019].
31. Ledford D., Busse W., Trzaskoma B. et al. A randomized multicenter study evaluating Xolair persistence of response after long-term therapy. *J. Allergy Clin. Immunol.* 2017; 140 (1): 162–169. DOI: 10.1016/j.jaci.2016.08.054.
32. Hanania N.A., Wenzel S., Rosen K. et al. Exploring the effects of omalizumab in allergic asthma: an analysis of biomarkers in the EXTRA study. *Am. J. Respir. Crit. Care Med.* 2013; 187 (8): 804–811. DOI: 10.1164/rccm.201208-1414OC.
33. Busse W., Spector S., Rosen K. et al. High eosinophil count: a potential biomarker for assessing successful omalizumab treatment effects. *J. Allergy Clin. Immunol.* 2013; 132 (2): 485–486. DOI: 10.1016/j.jaci.2013.02.032.
34. Izuhara K., Ohta S., Ono J. Using periostin as a biomarker in the treatment of asthma. *Allergy Asthma Immunol. Res.* 2016; 8 (6): 491–498. DOI: 10.4168/air.2016.8.6.491.
35. Casale T.B., Chipps B.E., Rosen K. et al. Response to omalizumab using patient enrichment criteria from trials of novel biologics in asthma. *Allergy.* 2018; 73 (2): 490–497. DOI: 10.1111/all.13302.
36. Busse W., Corren J., Lanier B.Q. et al. Omalizumab, anti-IgE recombinant humanized monoclonal antibody, for the treatment of severe allergic asthma. *J. Allergy Clin. Immunol.* 2001; 108 (2): 184–190. DOI: 10.1067/mai.2001.117880.
37. Soler M., Matz J., Townley R. et al. The anti-IgE antibody omalizumab reduces exacerbations and steroid requirement in allergic asthmatics. *Eur. Respir. J.* 2001; 18 (2): 254–261. DOI: 10.1183/09031936.01.00092101.
38. Humbert M., Taille C., Mala L. et al. Omalizumab effectiveness in patients with severe allergic asthma according to blood eosinophil count: the STELLAIR study. *Eur. Respir. J.* 2018; 51 (5): 1702523. DOI: 10.1183/13993003.02523-2017.
39. British Thoracic Society, Scottish Intercollegiate Guidelines Network. British Guideline on the Management of Asthma. SIGN 158. 2019. Available at: [www.sign.ac.uk](http://www.sign.ac.uk) [Accessed: October 28, 2019].
40. Kerstjens H.A.M., Disse B., Schroder-Babo W. et al. Tiotropium improves lung function in patients with severe uncontrolled asthma: a randomized controlled trial. *J. Allergy Clin. Immunol.* 2011; 128 (2): 308–314. DOI: 10.1016/j.jaci.2011.04.039.
41. Kerstjens H.A.M., Engel M., Dahl R. et al. Tiotropium in asthma poorly controlled with standard combination therapy. *N. Engl. J. Med.* 2012; 367 (13): 1198–1207. DOI: 10.1056/NEJMoa1208606.
42. Hamelmann E., Bernstein J.A., Vandewalker M. et al. A randomized controlled trial of tiotropium in adolescents with severe symptomatic asthma. *Eur. Respir. J.* 2017; 49 (1): 1601100. DOI: 10.1183/13993003.01100-2016.
43. Kerwin E., Wachtel A., Sher L. et al. Efficacy, safety, and dose response of glycopyrronium administered by metered dose inhaler using co-suspension delivery technology in subjects with intermittent or mild-to-moderate persistent asthma: a randomized controlled trial. *Respir. Med.* 2018; 139: 39–47. DOI: 10.1016/j.rmed.2018.04.013.
44. Lee L.A., Briggs A., Edwards L.D. et al. A randomized, three-period crossover study of umecclidinium as monotherapy in adult patients with asthma. *Respir. Med.* 2015; 109 (1): 63–73. DOI: 10.1016/j.rmed.2014.10.009.
45. Lee L.A., Yang S., Kerwin E. et al. The effect of fluticasone furoate/umeclidinium in adult patients with asthma: a randomized, dose-ranging study. *Respir. Med.* 2015; 109 (1): 54–62. DOI: 10.1016/j.rmed.2014.09.012.
46. Peters S.P., Bleeker E.R., Kunselman S.J. et al. Predictors of response to tiotropium versus salmeterol in asthmatic adults. *J. Allergy Clin. Immunol.* 2013; 132 (5): 1068–1074. DOI: 10.1016/j.jaci.2013.08.003.
47. Kerstjens H.A., Moroni-Zentgraf P., Tashkin D.P. et al. Tiotropium improves lung function, exacerbation rate, and asthma control, independent of baseline characteristics including age, degree of airway obstruction, and allergic status. *Respir. Med.* 2016; 117: 198–206. DOI: 10.1016/j.rmed.2016.06.013.
48. Szefer S.J., Murphy K., Harper T. 3<sup>rd</sup> et al. A phase III randomized controlled trial of tiotropium add-on therapy in children with severe symptomatic asthma. *J. Allergy Clin. Immunol.* 2017; 140 (5): 1277–1287. DOI: 10.1016/j.jaci.2017.01.014.
49. National asthma education and prevention program. Guidelines for the diagnosis and management of asthma 2007 (EPR-3). Available at: [www.nhlbi.nih.gov/health-topics/guidelines-for-diagnosis-management-of-asthma](http://www.nhlbi.nih.gov/health-topics/guidelines-for-diagnosis-management-of-asthma) [Accessed: October 28, 2019].
50. Brusselle G.G., VanderStichele C., Jordens P. et al. Azithromycin for prevention of exacerbations in severe asthma (AZISAST): a multicentre randomised double-blind placebo-controlled trial. *Thorax.* 2013; 68 (4): 322–329. DOI: 10.1136/thoraxjnl-2012-202698.
51. Gibson P.G., Yang I.A., Upham J.W. et al. Effect of azithromycin on asthma exacerbations and quality of life in adults with persistent uncontrolled asthma (AMAZES): a randomised, double-blind, placebo-controlled trial. *Lancet.* 2017; 390 (10095): 659–668. DOI: 10.1016/S0140-6736(17)31281-3.
52. Strunk R.C., Bacharier L.B., Phillips B.R. et al. Azithromycin or montelukast as inhaled corticosteroid-sparing agents in moderate-to-severe childhood asthma study. *J. Allergy Clin. Immunol.* 2008; 122 (6): 1138–1144. DOI: 10.1016/j.jaci.2008.09.028.
53. Hahn D.L., Grasmick M., Hetzel S., Yale S. Azithromycin for bronchial asthma in adults: an effectiveness trial. *J. Am. Board Fam. Med.* 2012; 25 (4): 442–459. DOI: 10.3122/jabfm.2012.04.110309.
54. Sutherland E.R., King T.S., Icitovic N. et al. A trial of clarithromycin for the treatment of suboptimally controlled asthma. *J. Allergy Clin. Immunol.* 2010; 126 (4): 747–753. DOI: 10.1016/j.jaci.2010.07.024.
55. Simpson J.L., Powell H., Boyle M.J. et al. Clarithromycin targets neutrophilic airway inflammation in refractory asthma. *Am. J. Respir. Crit. Care Med.* 2008; 177 (2): 148–155. DOI: 10.1164/rccm.200707-1134OC.
56. Taylor S.L., Leong L.E.X., Mobegi F.M. et al. Long-term azithromycin reduces Haemophilus influenzae and increases antibiotic resistance in severe asthma. *Am. J. Respir. Crit. Care Med.* 2019; 200 (3): 309–317. DOI: 10.1164/rccm.201809-1739OC.
57. British Thoracic Society, Scottish Intercollegiate Guidelines Network. British guideline on the management of asthma. 2016. SIGN 153. Available at: [www.brit-thoracic.org.uk/quality-improvement/guidelines/asthma](http://www.brit-thoracic.org.uk/quality-improvement/guidelines/asthma) [Accessed: October 28, 2019].
58. Wenzel S., Castro M., Corren J. et al. Dupilumab efficacy and safety in adults with uncontrolled persistent asthma despite use of medium-to-high-dose inhaled corticosteroids plus a long-acting  $\beta_2$  agonist: a randomized double-blind placebo-controlled pivotal phase 2b dose-ranging trial. *Lancet.* 2016; 388 (10039): 31–44. DOI: 10.1016/S0140-6736(16)30307-5.



59. Castro M., Corren J., Pavord I.D. et al. Dupilumab efficacy and safety in moderate-to-severe uncontrolled asthma. *N. Engl. J. Med.* 2018; 378 (26): 2486–2496. DOI: 10.1056/NEJMoa1804092.
60. Rabe K.F., Nair P., Brusselle G. et al. Efficacy and safety of dupilumab in glucocorticoid-dependent severe asthma. *N. Engl. J. Med.* 2018; 378 (26): 2475–2485. DOI: 10.1056/NEJMoa1804093.
61. Brown T., Jones T., Gove K. et al. Randomised controlled trials in severe asthma: selection by phenotype or stereotype. *Eur. Respir. J.* 2018; 52 (6): 1801444. DOI: 10.1183/13993003.01444-2018.
62. Agusti A., Bel E., Thomas M. et al. Treatable traits: toward precision medicine of chronic airway diseases. *Eur. Respir. J.* 2016; 47 (2): 410–419. DOI: 10.1183/13993003.01359-2015.
63. Pavord I.D., Beasley R., Agusti A. et al. After asthma: redefining airways diseases. *Lancet.* 2018; 391 (10118): 350–400. DOI: 10.1016/S0140-6736(17)30879-6.
64. Shrimanker R., Beasley R., Kearns C. Letting the right one in: evaluating the generalisability of clinical trials. *Eur. Respir. J.* 2018; 52 (6): 1802218. DOI: 10.1183/13993003.02218-2018.
65. Pavord I.D., Chanez P., Criner G.J. et al. Mepolizumab for eosinophilic chronic obstructive pulmonary disease. *N. Engl. J. Med.* 2017; 377 (17): 1613–1629. DOI: 10.1056/NEJMoa1708208.
66. Kerkhof M., Sonnappa S., Postma D.S. et al. Blood eosinophil count and exacerbation risk in patients with COPD. *Eur. Respir. J.* 2017; 50 (1): 1700761. DOI: 10.1183/13993003.00761-2017.
67. Levy M.L., Winter R. Asthma deaths: what now? *Thorax.* 2015; 70 (3): 209–210. DOI: 10.1136/thoraxjnl-2015-206800.
68. Royal College of Physicians. National Review of Asthma Deaths 2012–2013. 2015. Available at: [www.rcplondon.ac.uk/projects/national-review-asthma-deaths](http://www.rcplondon.ac.uk/projects/national-review-asthma-deaths) [Accessed: October 01, 2019].
69. Bush A., Saglani S., Fleming L. Severe asthma: looking beyond the amount of medication. *Lancet Respir. Med.* 2017; 5 (11): 844–846. DOI: 10.1016/S2213-2600(17)30379-X.
70. Green R.H., Shaw D. Strict adherence rules to obtain monoclonal therapy might cost lives. *Lancet Respir. Med.* 2017; 5 (9): 678–679. DOI: 10.1016/S2213-2600(17)30238-2.
71. Andersson C.K., Adams A., Nagakumar P. et al. Intraepithelial neutrophils in pediatric severe asthma are associated with better lung function. *J. Allergy Clin. Immunol.* 2017; 139 (6): 1819–1829. DOI: 10.1016/j.jaci.2016.09.022.
72. Bossley C.J., Fleming L., Gupta A. et al. Pediatric severe asthma is characterized by eosinophilia and remodeling without T<sub>H</sub>2 cytokines. *J. Allergy Clin. Immunol.* 2012; 129 (4): 974–982. DOI: 10.1016/j.jaci.2012.01.059.
73. Kuo C.S., Pavlidis S., Loza M. et al. T-helper cell type 2 (Th2) and non-Th2 molecular phenotypes of asthma using sputum transcriptomics in U-BIOPRED. *Eur. Respir. J.* 2017; 49 (2): 1602135. DOI: 10.1183/13993003.02135-2016.
74. Travers J., Rothenberg M.E. Eosinophils in mucosal immune responses. *Mucosal. Immunol.* 2015; 8 (3): 464–475. DOI: 10.1038/mi.2015.2.
75. Normansell R., Walker S., Milan S.J. et al. Omalizumab for asthma in adults and children. *Cochrane Database Syst. Rev.* 2014; (1): CD003559. DOI: 10.1002/14651858.CD003559.pub4.
76. Corren J., Kavati A., Ortiz B. et al. Efficacy and safety of omalizumab in children and adolescents with moderate-to-severe asthma: a systematic literature review. *Allergy Asthma Proc.* 2017; 38 (4): 250–263. DOI: 10.2500/aap.2017.38.4067.
77. Odajima H., Ebisawa M., Nagakura T. et al. Long-term safety, efficacy, pharmacokinetics and pharmacodynamics of omalizumab in children with severe uncontrolled asthma. *Allergol. Int.* 2017; 66 (1): 106–115. DOI: 10.1016/j.alit.2016.06.004.
78. Saglani S., Bush A., Carroll W. et al. Biologics for paediatric severe asthma: trick or TREAT? *Lancet Respir. Med.* 2019; 7 (4): 294–296. DOI: 10.1016/S2213-2600(19)30045-1.
79. Nair P., O'Byrne P.M. The interleukin-13 paradox in asthma: effective biology, ineffective biologicals. *Eur. Respir. J.* 2019; 53 (2): 1802250. DOI: 10.1183/13993003.02250-2018.
80. Chung K.F. Tralokinumab unsuccessful for management of severe, uncontrolled asthma. *Lancet Respir. Med.* 2018; 6 (7): 480–481. DOI: 10.1016/S2213-2600(18)30194-2.
81. Busse W.W., Brusselle G.G., Korn S. et al. Tralokinumab did not demonstrate oral corticosteroid-sparing effects in severe asthma. *Eur. Respir. J.* 2019; 53 (2): 1800948. DOI: 10.1183/13993003.00948-2018.
82. Russell R.J., Chachi L., FitzGerald J.M. et al. Effect of tralokinumab, an interleukin-13 neutralising monoclonal antibody, on eosinophilic airway inflammation in uncontrolled moderate-to-severe asthma (MESOS): a multicentre, double-blind, randomised, placebo-controlled phase 2 trial. *Lancet Respir. Med.* 2018; 6 (7): 499–510. DOI: 10.1016/S2213-2600(18)30201-7.
83. Panettieri R.A. Jr, Sjobring U., Peterffy A. et al. Tralokinumab for severe, uncontrolled asthma (STRATOS 1 and STRATOS 2): two randomised, double-blind, placebo-controlled, phase 3 clinical trials. *Lancet Respir. Med.* 2018; 6 (7): 511–525. DOI: 10.1016/S2213-2600(18)30184-X.
84. Pilette C., Brightling C., Lacombe D., Brusselle G. Urgent need for pragmatic trial platforms in severe asthma. *Lancet Respir. Med.* 2018; 6 (8): 581–583. DOI: 10.1016/S2213-2600(18)30291-1.
85. Bousquet J., Mantzouranis E., Cruz A.A. et al. Uniform definition of asthma severity, control, and exacerbations: document presented for the World Health Organization Consultation on Severe Asthma. *J. Allergy Clin. Immunol.* 2010; 126 (5): 926–938. DOI: 10.1016/j.jaci.2010.07.019.

На сайте <https://erj.ersjournals.com> содержатся дополнительные материалы к этой статье.

Получено 13.04.19. Принято после пересмотра: 08.08.19

Авторское право ©ERS, 2020

This article has supplementary material available

from [erj.ersjournals.com](http://erj.ersjournals.com)

Received: April 13, 2019. Accepted after revision: August 08, 2019

Copyright ©ERS, 2020
